# Supplementary material for: Dramatic impact of blood collection tube and RNA purification method on extracellular RNA transcriptomes
Source: Research Square preprint supplement (doi:10.21203/rs.3.rs-2409038/v1), 2024-07-15
Supplement: Supplementary file [file 1afc9683c5b2d060f9fa88ea.pdf]

# Supplementary Fig. 2.

- miRNeasy Serum/Plasma Advanced Kit (MIRA)
- Plasma/Serum Circulating and Exosomal RNA Purification Kit/Slurry Format (CIRC)
- MagNA Pure 24 Total NA Isolation Kit in combination with the MagNA Pure instrument (MAP)
- Maxwell RSC miRNA Plasma and Serum Kit in combination with the Maxwell RSC Instrument (MAX)
- NucleoSpin miRNA Plasma Kit (NUC)
- miRNeasy Serum/Plasma Kit (MIR)
- QIAamp ccfDNA/RNA Kit (CCF)
- mirVana PARIS Kit (MIRV)

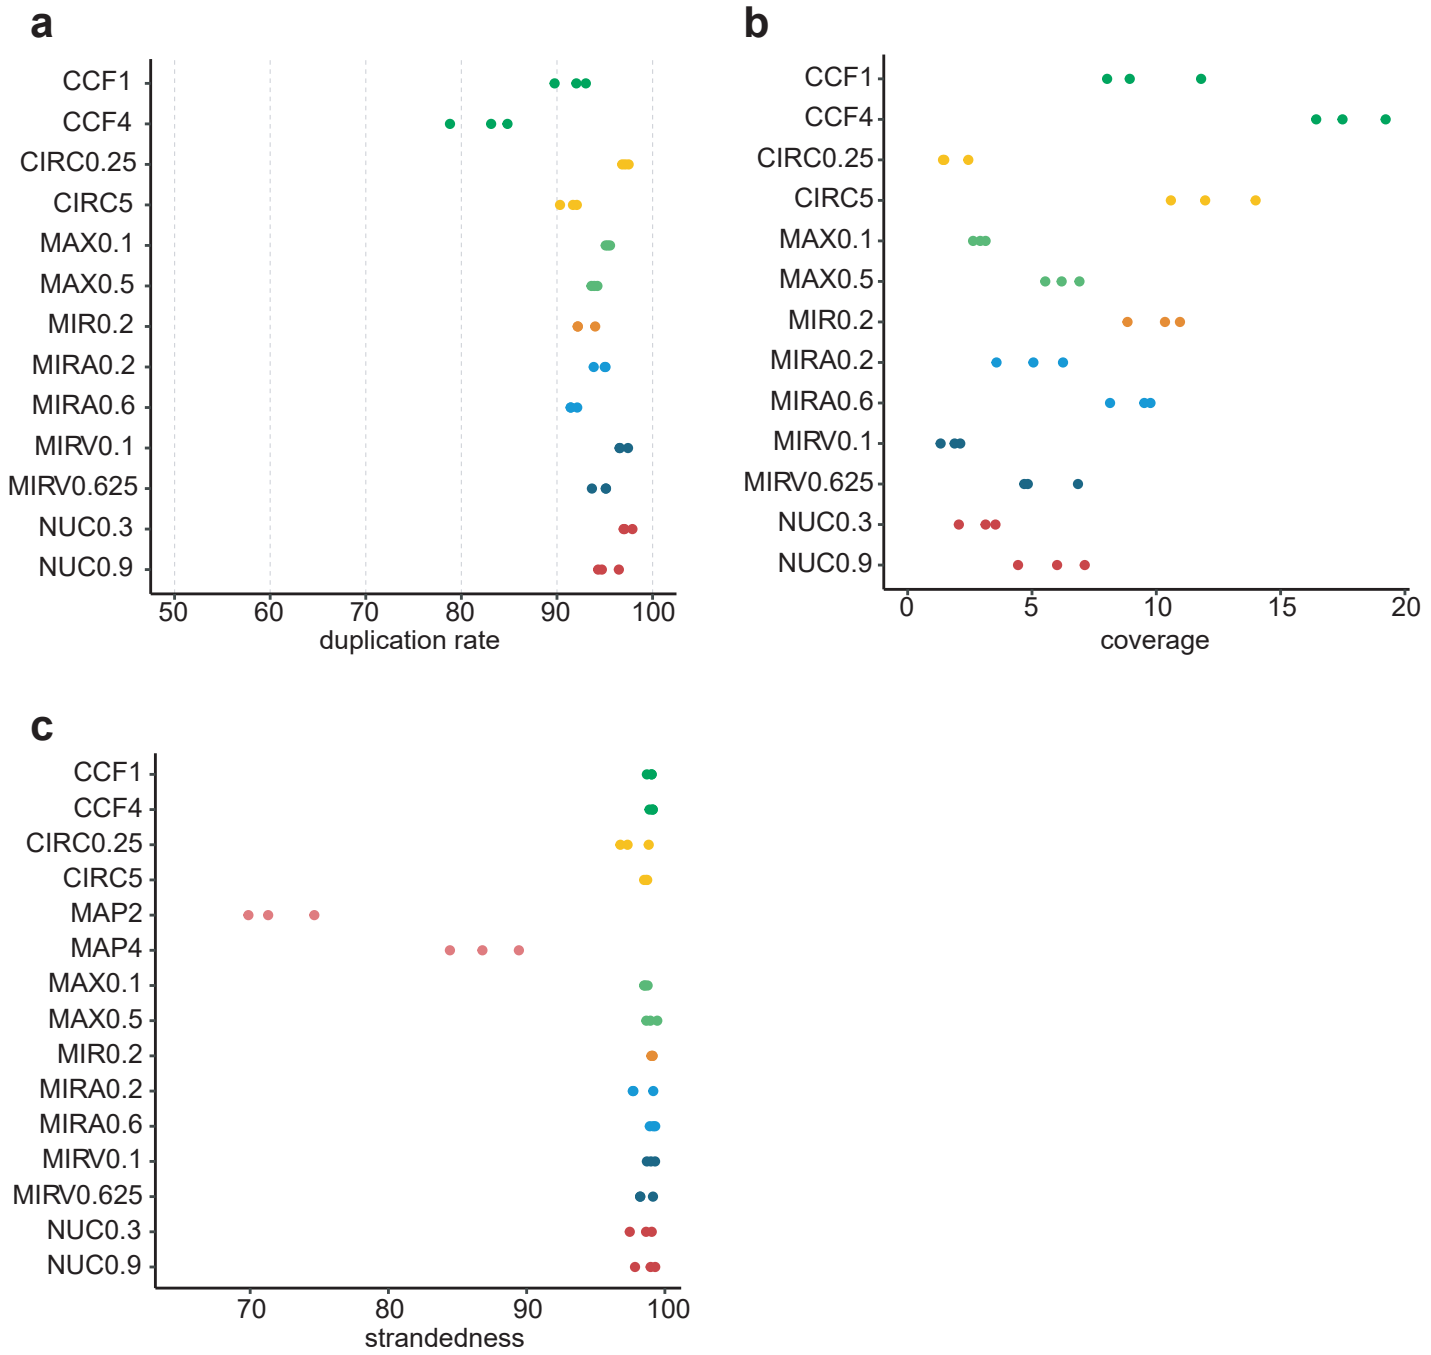

**Supplementary Fig. 2: Performance of RNA purification kits on duplication rate, coverage and strandedness at mRNA level.** For each of the unique RNA purification-plasma input volume combinations, 3 technical replicates are analyzed. **(a)** Percentage of read duplicates found by Clumpify after subsampling (n = 39). **(b)** Percentage of bases in the total transcriptome that are covered at least once (n = 39). **(c)** Percentage of reads on correct strand according to strand-specific protocol (n = 45). The number that follows the abbreviation of the purification kit is the plasma input volume (in ml).
