# Supplementary material for: Dramatic impact of blood collection tube and RNA purification method on extracellular RNA transcriptomes
Source: Research Square preprint supplement (doi:10.21203/rs.3.rs-2409038/v1), 2024-07-15
Supplement: Supplementary file [file 2ff4fd4842e7d9eeb7e699e4.pdf]

a

mRNA

Spearman = 0.67, p-value = 5e-04

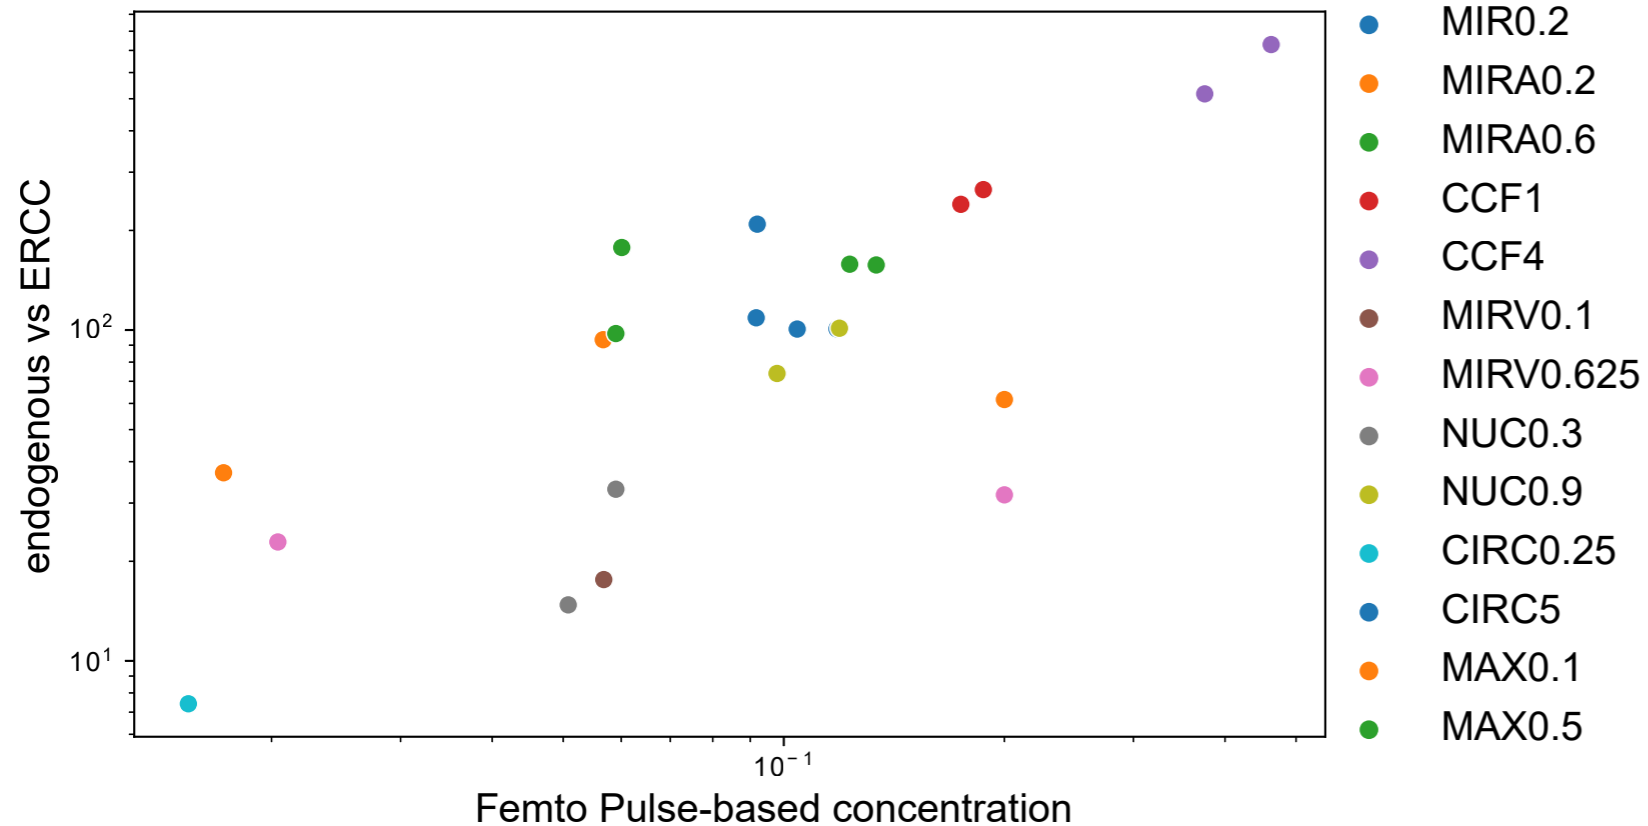

b

small RNA

Spearman = 0.86, p-value = 5e-14

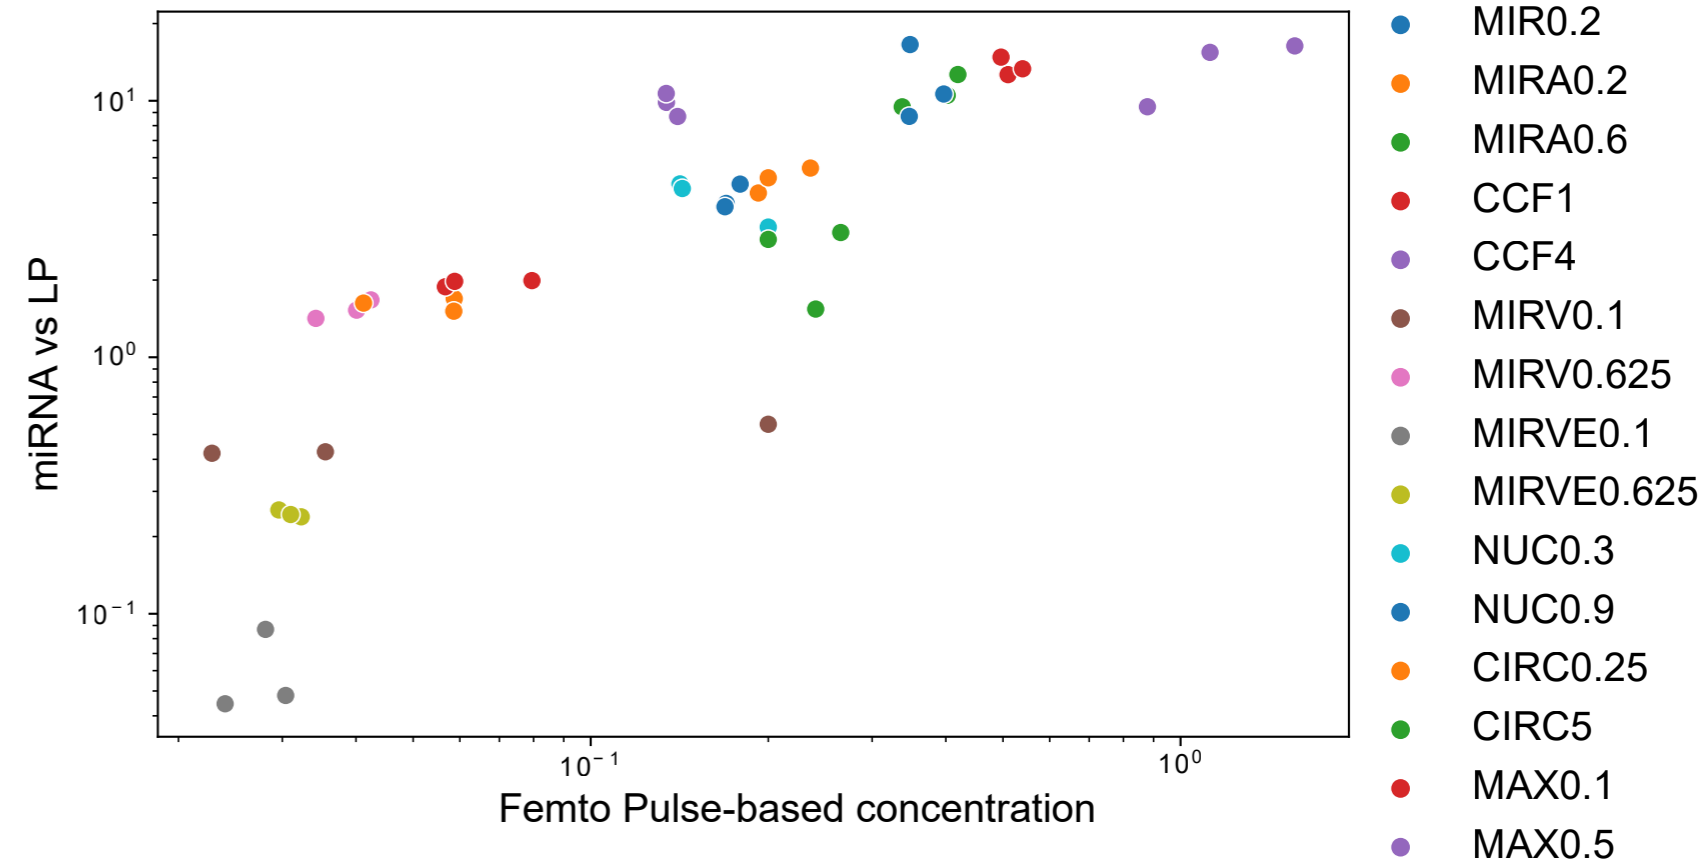

**Supplementary Fig. 3: Correlation between Femto Pulse-based (in ng/ $\mu$ l) and sequencing-based eluate RNA concentrations.** (a) Endogenous mRNA vs ERCC ratio of RNA purification kits. (b) Endogenous small RNA vs LP ratio of RNA purification kits. Only samples with a Femto Pulse concentration above the limit of quantification (15 pg/ $\mu$ l) were kept ( $n = 23$  for mRNA capture sequencing,  $n = 45$  for small RNA sequencing). Axes showed in logarithmic scale. Spearman correlation coefficients and p-values are indicated (calculated using the spearmanr function (Scipy library) in Python). CCF: QIAamp ccfDNA/RNA Kit; CIRC: Plasma/Serum Circulating and Exosomal RNA Purification Kit/Slurry Format; ERCC: Extracellular RNA Communication Consortium; LP: Library Prep Control; MAX: Maxwell RSC miRNA Plasma and Exosome Kit in combination with the Maxwell RSC Instrument; MIR: miRNeasy Serum/Plasma Kit; MIRA: miRNeasy Serum/Plasma Advanced Kit; MIRV: mirVana PARIS Kit with purification protocol for total RNA; MIRVE: mirVana PARIS Kit with purification protocol for RNA enriched for small RNAs; NUC: NucleoSpin miRNA Plasma Kit.
