# Supplementary material for: Dramatic impact of blood collection tube and RNA purification method on extracellular RNA transcriptomes
Source: Research Square preprint supplement (doi:10.21203/rs.3.rs-2409038/v1), 2024-07-15
Supplement: Supplementary file [file 3d522649e3d6c03a27254884.pdf]

# Supplementary Fig. 6.

**a** plot of evolution over time – example

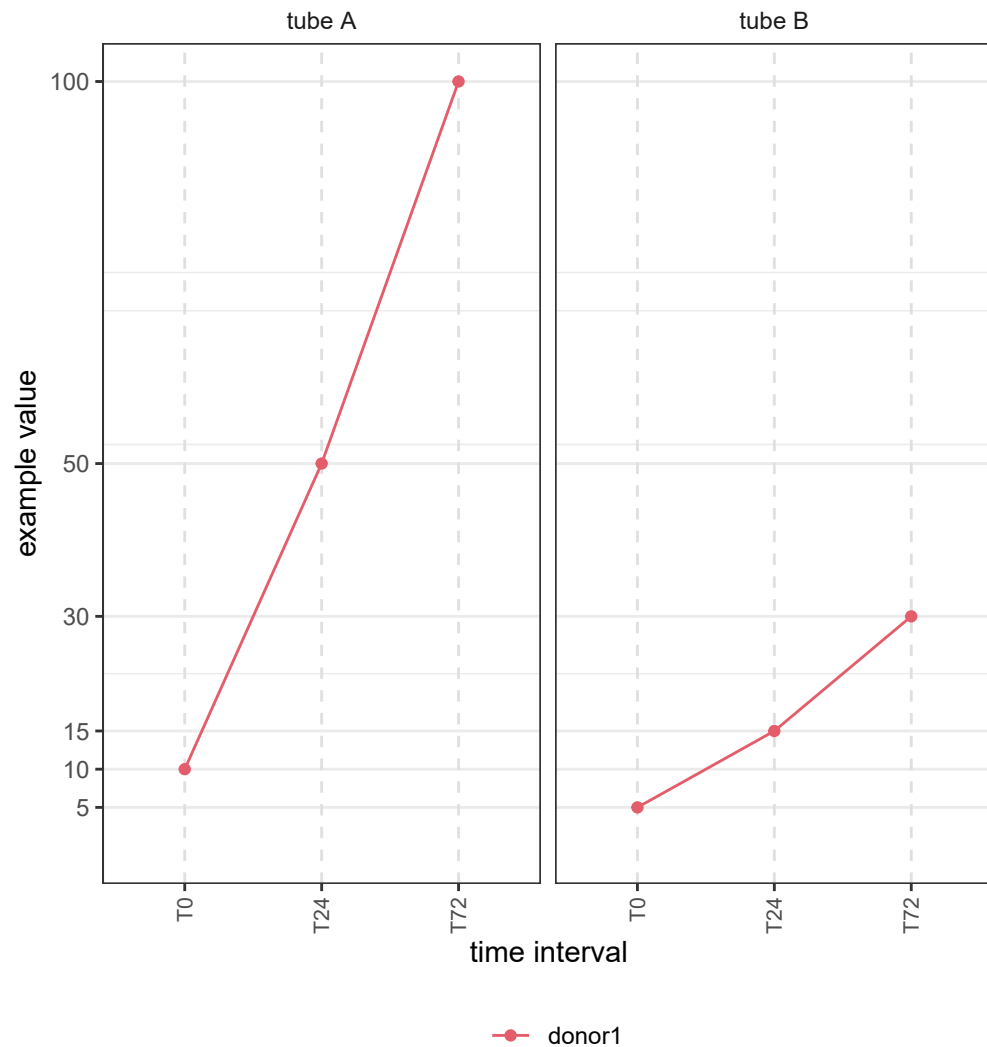

**b** fold change plot – example ordered by mean

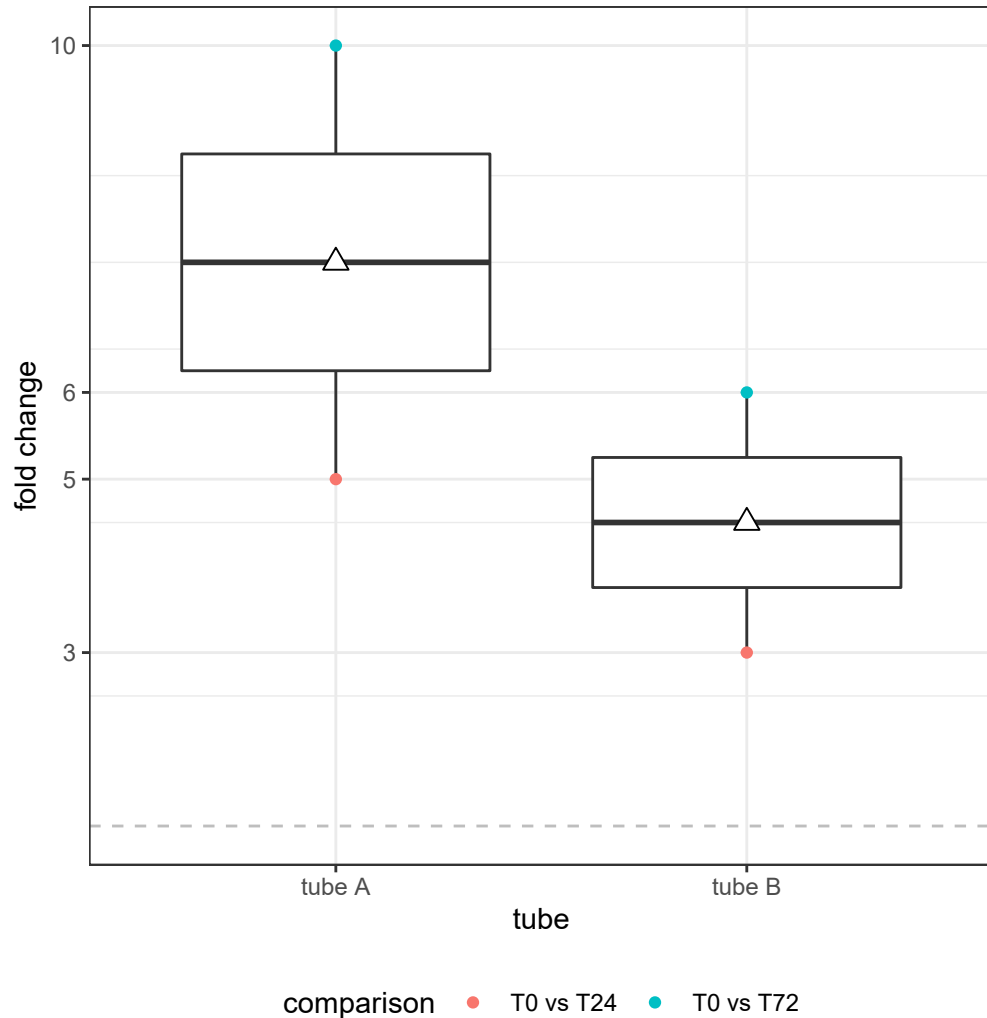

**Supplementary Fig. 6: Illustrative example of performance metric evolution over time** for one donor, two blood collection tubes and three time intervals (a) and corresponding boxplot of the fold changes per blood collection tube (b). T0: plasma prepared immediately after blood draw, T24, T72: plasma prepared 24 hours and 72 hours after blood draw, respectively. The white triangle on the boxplot corresponds to the mean. Reproduced from Van Paemel et al.<sup>53</sup>
