# Supplementary material for: Dramatic impact of blood collection tube and RNA purification method on extracellular RNA transcriptomes
Source: Research Square preprint supplement (doi:10.21203/rs.3.rs-2409038/v1), 2024-07-15
Supplement: Supplementary file [file 32d5d055a94d5b9a4df36295.pdf]

Supplementary Fig. 1.

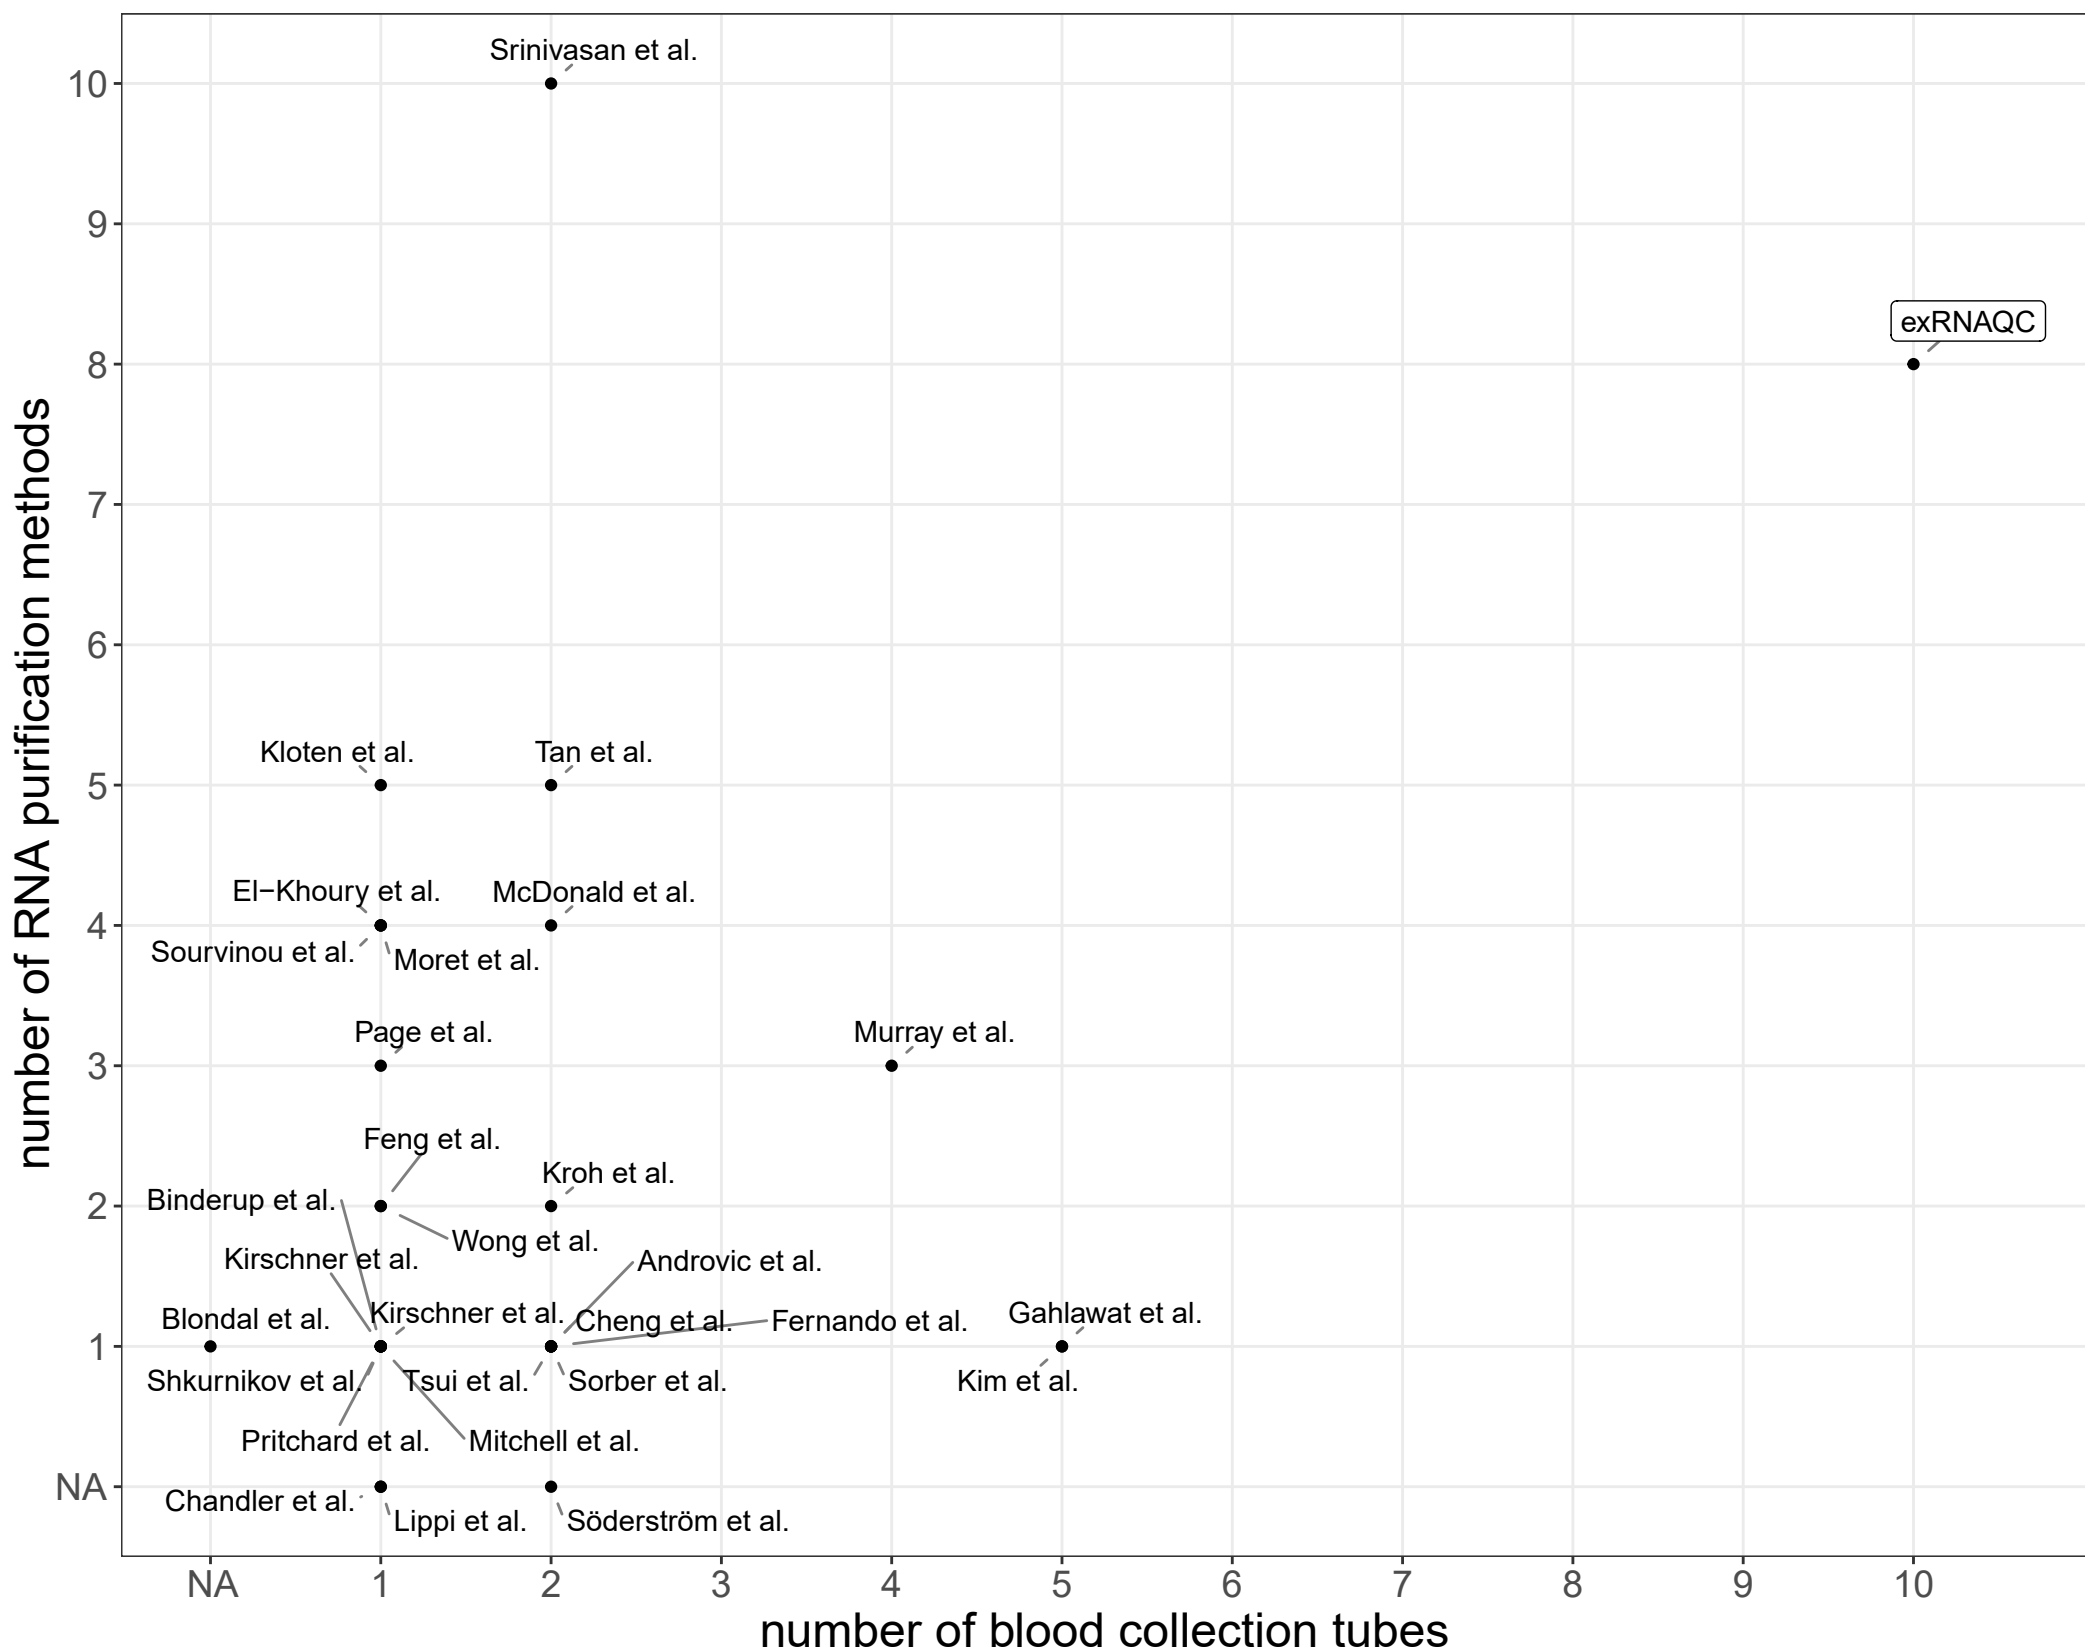

**Supplementary Fig. 1: The exRNAQC study represents the most comprehensive analysis of pre-analytics in the context of exRNA profiling.** The exRNAQC study outperforms previous studies analyzing pre-analytics impacting exRNA analyses in terms of the number of evaluated blood collection tubes and RNA purification methods (Supplementary Table 1). Studies are annotated with NA if the number of blood collection tubes or RNA purification methods cannot be clearly determined from the corresponding publication or if no RNA purification was performed.
