# Supplementary material for: Dramatic impact of blood collection tube and RNA purification method on extracellular RNA transcriptomes
Source: Research Square preprint supplement (doi:10.21203/rs.3.rs-2409038/v1), 2024-07-15
Supplement: Supplementary file [file ac8f9868e007d3433550128b.pdf]

|    |                                                                                                     |           |
|----|-----------------------------------------------------------------------------------------------------|-----------|
| 1  | <b>1. Donor material and biofluid preparation procedure</b>                                         | <b>3</b>  |
| 2  | 1.1. <i>Blood draws and biofluid preparations for exRNAQC study phase 1</i>                         | 3         |
| 3  | 1.1.1. Blood draws and plasma preparations for evaluation of the different exRNA purification       |           |
| 4  | methods                                                                                             | 3         |
| 5  | 1.1.2. Blood draws and biofluid preparations for evaluation of the different blood collection       |           |
| 6  | tubes                                                                                               | 4         |
| 7  | 1.2. <i>Blood draws and biofluid preparations for exRNAQC study phase 2</i>                         | 8         |
| 8  | <b>2. Spike-in controls</b>                                                                         | <b>11</b> |
| 9  | 2.1. <i>Sequin and External RNA Control Consortium (ERCC) spike-in controls for mRNA capture</i>    |           |
| 10 | <i>sequencing</i>                                                                                   | 11        |
| 11 | 2.2. <i>Capture probes for Sequin and ERCC spike-in controls</i>                                    | 12        |
| 12 | 2.3. <i>RNA extraction Control (RC) and Library Prep Control (LP) spike-ins for small RNA</i>       |           |
| 13 | <i>sequencing</i>                                                                                   | 12        |
| 14 | <b>3. RNA purification methods</b>                                                                  | <b>14</b> |
| 15 | 3.1. <i>The miRNeasy Serum/Plasma Kit (abbreviated to MIR; Qiagen, 217184)</i>                      | 14        |
| 16 | 3.2. <i>The miRNeasy Serum/Plasma Advanced Kit (abbreviated to MIRA; Qiagen, 217204)</i>            | 15        |
| 17 | 3.3. <i>The mirVana PARIS Kit (abbreviated to MIRV (and MIRVE); Life Technologies, AM1556)</i>      | 16        |
| 18 | 3.4. <i>The NucleoSpin miRNA Plasma Kit (abbreviated to NUC; Macherey-Nagel, 740981.50)</i>         | 17        |
| 19 | 3.5. <i>The QIAamp ccfDNA/RNA Kit (abbreviated to CCF; Qiagen, 55184)</i>                           | 18        |
| 20 | 3.6. <i>The Plasma/Serum Circulating and Exosomal RNA Purification Kit/Slurry Format</i>            |           |
| 21 | <i>(abbreviated to CIRC; Norgen Biotek Corp., 42800)</i>                                            | 19        |
| 22 | 3.7. <i>The Maxwell RSC miRNA Plasma and Serum Kit (Promega, custom catalog AX5740,</i>             |           |
| 23 | <i>AS1680) in combination with the Maxwell RSC Instrument (abbreviated to MAX; Promega, AS4500)</i> |           |
| 24 | 20                                                                                                  |           |
| 25 | 3.7.1. Protocol AX5740                                                                              | 21        |
| 26 | 3.7.2. Protocol AS1680                                                                              | 21        |
| 27 | 3.8. <i>The MagNA Pure 24 Total NA Isolation Kit (Roche, 07658036001) in combination with the</i>   |           |
| 28 | <i>MagNA Pure 24 instrument (abbreviated to MAP; Roche, 07290519001)</i>                            | 21        |

|    |                                          |           |
|----|------------------------------------------|-----------|
| 29 | <b>4. RNA concentration measurements</b> | <b>22</b> |
| 30 | <b>5. References</b>                     | <b>22</b> |
| 31 |                                          |           |
| 32 |                                          |           |

33 **1. Donor material and biofluid preparation procedure**

34

35 **1.1. Blood draws and biofluid preparations for exRNAQC study phase 1**

36

37 *1.1.1. Blood draws and plasma preparations for evaluation of the different exRNA purification*  
38 *methods*

39 To evaluate eight different exRNA purification methods, separate blood draws were performed  
40 for each RNA sequencing workflow (mRNA or small RNA). The blood was drawn at once from  
41 each healthy donor and immediately processed to plasma. More specifically, 25 and 26 BD  
42 Vacutainer Plastic K2EDTA tubes (Becton Dickinson and Company, 367525) were collected  
43 in a single elbow venipuncture using a BD Vacutainer Push Button Blood Collection Set  
44 (Becton Dickinson and Company, 367326) for mRNA capture sequencing (experiment  
45 exRNAQC004) and small RNA sequencing (experiment exRNAQC011), respectively. All tubes  
46 were inverted 5 times to mix the anti-coagulant with the blood, immediately transported to the  
47 lab for further processing, and inverted 5 times before taking an aliquot to measure the number  
48 of platelets present in whole blood (using an XN-1000 Hematology Analyzer (Sysmex)). Next,  
49 centrifugation was performed in a Centrifuge 5804 (Eppendorf, 5804000013) with Rotor A-4-  
50 44 (Eppendorf, 5804709004) and appropriate adapters (Eppendorf, 5804753003) at  
51 acceleration and braking ramp 0. In a first centrifugation step, blood collection tubes were spun  
52 for 20 min at 400 g at room temperature, and the obtained plasma was carefully pooled, leaving  
53  $\pm 0.5$  cm above the buffy coat. An aliquot of 7.3 ml (for mRNA capture sequencing) or 6.9 ml  
54 (for small RNA sequencing) pooled plasma was set aside and the remaining volume of plasma  
55 equally distributed across 15 ml tubes (Greiner Bio-One International, 188271) to be  
56 centrifuged for 10 min at 800 g at room temperature. After this second spin, all plasma was  
57 pooled, leaving  $\pm 0.5$  cm above the pellets and again equally distributed across 15 ml tubes.  
58 Subsequently, a third spin of 15 min at 2500 g at room temperature was applied. The plasma  
59 was again pooled, leaving  $\pm 0.5$  cm above the pellets. In total, 66 ml (for mRNA capture  
60 sequencing) or 69 ml (for small RNA sequencing) of this plasma was mixed with the

61 corresponding plasma aliquot previously set aside. This plasma mixture was aliquoted into  
62 Safe-Lock cup DNA LoBind 2 ml PCR clean tubes (Eppendorf, 0030108078), snap frozen in  
63 liquid nitrogen and stored at -80 °C. Platelets were counted and the degree of hemolysis was  
64 determined by measuring levels of free haemoglobin by spectral analysis using a NanoDrop  
65 1000 Spectrophotometer (Thermo Fisher Scientific).

66

67 *1.1.2. Blood draws and biofluid preparations for evaluation of the different blood collection*  
68 *tubes*

69 For the evaluation of ten different blood collection tubes (experiments exRNAQC005 and  
70 exRNAQC013), three separate blood draw experiments (one for each class of tubes) were  
71 planned with different donors. In each of these three experiments, three healthy donors were  
72 sampled to collect blood in either non-preservation serum tubes, non-preservation plasma  
73 tubes or preservation plasma tubes (Table 1). For collection of the serum tubes, a single  
74 puncture of an antecubital vein was performed for each of the three donors using the BD  
75 Vacutainer Push Button Blood Collection Set with pre-attached tube holder (Becton Dickinson  
76 and Company, 368657). For collection of the non-preservation plasma tubes, two punctures  
77 (one in each antecubital vein) were performed to collect 6 tubes from each arm using the BD  
78 Vacutainer Push Button Blood Collection Set with pre-attached tube holder (Becton Dickinson  
79 and Company, 368657). For collection of the preservation plasma tubes, also two punctures  
80 were performed to collect 7 tubes from one antecubital vein and 8 tubes from the contralateral  
81 antecubital vein, using a BD Vacutainer Push Button Blood Collection Set with pre-attached  
82 tube holder (Becton Dickinson and Company, 367355). Note that for donor PNL-6AJP, three  
83 DNA Streck tubes needed to be redrawn at the end of the second vein puncture, due to loss  
84 of vacuum of the first three DNA Streck tubes that were used (Table 1). Each blood draw from  
85 each puncture started with collecting 2-3 ml blood in a waste tube, followed by collection of the  
86 different tube types. The collection order of these tubes was randomized per donor. Blood  
87 tubes were filled to the volume recommended by the manufacturer and plasma tubes were  
88 inverted 5 times to mix the anti-coagulant with the blood (Table 1). Subsequently, blood

89 collection tubes were processed immediately (T0), or 4 h (T04), 16 h (T16), 24 h (T24) or 72 h  
 90 (T72) at room temperature after blood collection in order to prepare plasma or Table 1).

91  
 92 **Table 1. Overview of the blood draws for evaluation of the 10 different blood collection tubes.** For each of  
 93 the three blood draw experiments, the draw order of the tubes per donor is given. serum: BD Vacutainer SST II  
 94 Advance Tube (Becton Dickinson and Company, 366444); EDTA: BD Vacutainer Plastic K2EDTA tube (Becton  
 95 Dickinson and Company, 367525); EDTA separator: Vacuette Tube 8 ml K2E K2EDTA Separator (Greiner Bio-  
 96 One, 455040); ACD-A: BD Vacutainer Glass ACD Solution A tube (Becton Dickinson and Company, 366645);  
 97 citrate: Vacuette Tube 9 ml 9NC Coagulation sodium citrate 3.2% (Greiner Bio-One, 455322); Roche: Cell-Free  
 98 DNA Collection Tube (Roche, 07785666001); Qiagen: PAXgene Blood ccfDNA Tube (Qiagen, 768115); Biomatrixa:  
 99 LBgard Blood Tube (Biomatrixa, M68021-001); DNA Streck: Cell-Free DNA BCT (Streck, 218996); RNA Streck:  
 100 Cell-Free RNA BCT (Streck, 230248).

| blood draw experiment   | donor    | puncture           | tube order         | time to process |
|-------------------------|----------|--------------------|--------------------|-----------------|
| non-preservation serum  | PNL-41H8 | 1                  | (1) serum          | T0              |
|                         |          |                    | (2) serum          | T16             |
|                         |          |                    | (3) serum          | T04             |
|                         | PNL-5TTC | 1                  | (1) serum          | T16             |
|                         |          |                    | (2) serum          | T04             |
|                         |          |                    | (3) serum          | T0              |
|                         | PNL-WUVM | 1                  | (1) serum          | T04             |
|                         |          |                    | (2) serum          | T16             |
|                         |          |                    | (3) serum          | T0              |
| non-preservation plasma | PNL-5AP8 | 1                  | (1) EDTA           | T0              |
|                         |          |                    | (2) EDTA separator | T16             |
|                         |          |                    | (3) EDTA separator | T0              |
|                         |          |                    | (4) EDTA           | T16             |
|                         |          |                    | (5) ACD-A          | T16             |
|                         |          |                    | (6) ACD-A          | T0              |
|                         |          | 2                  | (1) EDTA           | T04             |
|                         |          |                    | (2) ACD-A          | T04             |
|                         |          |                    | (3) citrate        | T16             |
|                         |          |                    | (4) citrate        | T04             |
|                         |          |                    | (5) citrate        | T0              |
|                         |          |                    | (6) EDTA separator | T04             |
|                         | PNL-BRCV | 1                  | (1) ACD-A          | T0              |
|                         |          |                    | (2) EDTA           | T04             |
|                         |          |                    | (3) EDTA separator | T04             |
|                         |          |                    | (4) EDTA           | T16             |
|                         |          |                    | (5) EDTA separator | T0              |
|                         |          |                    | (6) citrate        | T16             |
|                         |          | 2                  | (1) citrate        | T0              |
|                         |          |                    | (2) citrate        | T04             |
|                         |          |                    | (3) EDTA           | T0              |
|                         |          |                    | (4) ACD-A          | T16             |
|                         |          |                    | (5) EDTA separator | T16             |
|                         |          |                    | (6) ACD-A          | T04             |
| PNL-E6AU                | 1        | (1) citrate        | T04                |                 |
|                         |          | (2) EDTA           | T04                |                 |
|                         |          | (3) EDTA           | T0                 |                 |
|                         |          | (4) EDTA separator | T0                 |                 |
|                         |          | (5) ACD-A          | T0                 |                 |
|                         |          | (6) citrate        | T16                |                 |

| blood draw experiment | donor     | puncture        | tube order         | time to process |
|-----------------------|-----------|-----------------|--------------------|-----------------|
| preservation plasma   |           | 2               | (1) citrate        | T0              |
|                       |           |                 | (2) ACD-A          | T16             |
|                       |           |                 | (3) EDTA separator | T04             |
|                       |           |                 | (4) ACD-A          | T04             |
|                       |           |                 | (5) EDTA           | T16             |
|                       |           |                 | (6) EDTA separator | T16             |
|                       | PNL-KJ6S  | 1               | (1) Roche          | T72             |
|                       |           |                 | (2) Qiagen         | T24             |
|                       |           |                 | (3) Biomatrix      | T0              |
|                       |           |                 | (4) Roche          | T0              |
|                       |           |                 | (5) DNA Streck     | T24             |
|                       |           |                 | (6) RNA Streck     | T24             |
|                       |           |                 | (7) DNA Streck     | T0              |
|                       |           | 2               | (1) Qiagen         | T72             |
|                       |           |                 | (2) Biomatrix      | T72             |
|                       |           |                 | (3) Biomatrix      | T24             |
|                       |           |                 | (4) RNA Streck     | T72             |
|                       |           |                 | (5) RNA Streck     | T0              |
|                       |           |                 | (6) Roche          | T24             |
|                       |           |                 | (7) Qiagen         | T0              |
|                       | PNL-6AJP  | 1               | (8) DNA Streck     | T72             |
|                       |           |                 | (1) RNA Streck     | T0              |
|                       |           |                 | (2) Qiagen         | T0              |
|                       |           |                 | (3) DNA Streck     | not processed   |
|                       |           |                 | (4) Biomatrix      | T0              |
|                       |           |                 | (5) Roche          | T24             |
|                       |           |                 | (6) Biomatrix      | T24             |
|                       |           | (7) DNA Streck  | not processed      |                 |
| 2                     |           | (1) Roche       | T0                 |                 |
|                       |           | (2) Biomatrix   | T72                |                 |
|                       |           | (3) RNA Streck  | T24                |                 |
|                       | (4) Roche | T72             |                    |                 |
| PNL-IBXE              | 1         | (5) Qiagen      | T72                |                 |
|                       |           | (6) Qiagen      | T24                |                 |
|                       |           | (7) RNA Streck  | T72                |                 |
|                       |           | (8) DNA Streck  | not processed      |                 |
|                       |           | (9) DNA Streck  | T0                 |                 |
|                       |           | (10) DNA Streck | T24                |                 |
|                       |           | (11) DNA Streck | T72                |                 |
|                       | 2         | (1) Qiagen      | T0                 |                 |
|                       |           | (2) RNA Streck  | T0                 |                 |
|                       |           | (3) DNA Streck  | T0                 |                 |
|                       | 1         | (4) RNA Streck  | T72                |                 |
|                       |           | (5) Roche       | T24                |                 |
|                       |           | (6) Roche       | T0                 |                 |
|                       |           | (7) RNA Streck  | T24                |                 |
|                       | 2         | (1) Qiagen      | T72                |                 |
|                       |           | (2) Qiagen      | T24                |                 |
|                       |           | (3) DNA Streck  | T72                |                 |
|                       |           | (4) Biomatrix   | T0                 |                 |
|                       | 1         | (5) DNA Streck  | T24                |                 |
|                       |           | (6) Roche       | T72                |                 |
|                       | 2         | (7) Biomatrix   | T24                |                 |
|                       |           | (8) Biomatrix   | T72                |                 |

101

102 *Non-preservation serum tubes* were processed at T0 (i.e. 30 min upon blood collection to

103 enable full blood coagulation), T04 or T16 according to the following protocol. Until processing,

104 the tubes were stored upright at room temperature. Tubes were spun for 10 min at 1300 g at

105 room temperature using a Centrifuge 5804 (Eppendorf, 5804000013) with Rotor A-4-44  
106 (Eppendorf, 5804709004) and appropriate adapters (Eppendorf, 5804753003) at acceleration  
107 and braking ramp 0. For each tube, the obtained serum was carefully pipetted into a 15 ml  
108 tube (Greiner Bio-One International, 188271), leaving  $\pm 0.5$  cm above the separator. Serum  
109 was then aliquoted into Safe-Lock cup DNA LoBind 2 ml PCR clean tubes (Eppendorf,  
110 0030108078), snap frozen in liquid nitrogen and stored at  $-80$  °C. Platelets were counted (only  
111 for T0) and the degree of hemolysis was determined by measuring levels of free haemoglobin  
112 by spectral analysis using a NanoDrop 1000 Spectrophotometer (Thermo Fisher Scientific).

113

114 *Non-preservation plasma tubes* were processed at T0 (i.e. immediately), T04 or T16, and  
115 *preservation plasma tubes* at T0, T24 or T72, according to the following protocol. Until  
116 processing, the tubes were stored upright at room temperature. Right before centrifugation,  
117 tubes were inverted 5 times and an aliquot to measure the number of platelets present in full  
118 blood (using an XN-1000 Hematology Analyzer (Sysmex)) was taken. Tubes were spun on a  
119 Centrifuge 5804 (Eppendorf, 5804000013) with Rotor A-4-44 (Eppendorf, 5804709004) and  
120 appropriate adapters (Eppendorf, 5804753003) at acceleration and braking ramp 0. In a first  
121 centrifugation step, blood collection tubes were spun for 20 min at 400 g at room temperature,  
122 and for each tube, the obtained plasma was carefully pipetted into a 15 ml tube (Greiner Bio-  
123 One International, 188271), leaving  $\pm 0.5$  cm above the buffy coat. Subsequently, these tubes  
124 were centrifuged for 10 min at 800 g at room temperature. After this second spin, the plasma  
125 was pipetted into new 15 ml tubes, leaving  $\pm 0.5$  cm above the pellets. Finally, a third spin of  
126 15 min at 2500 g at room temperature was applied. The plasma was again pipetted into new  
127 15 ml tubes, leaving  $\pm 0.5$  cm above the pellets, and aliquoted into Safe-Lock cup DNA LoBind  
128 2 ml PCR clean tubes (Eppendorf, 0030108078), snap frozen in liquid nitrogen and stored at -  
129 80 °C. Platelets were counted and the degree of hemolysis was determined by measuring  
130 levels of free haemoglobin by spectral analysis using a NanoDrop 1000 Spectrophotometer  
131 (Thermo Fisher Scientific).

132

133 **1.2. Blood draws and biofluid preparations for exRNAQC study phase 2**

134 For each sequencing workflow, a separate blood draw experiment with five donors was  
 135 performed (Table 2). Blood was collected in either serum (BD Vacutainer SST II Advance  
 136 Tube; Becton Dickinson and Company, 367953), EDTA (BD Vacutainer Plastic K2EDTA tube;  
 137 Becton Dickinson and Company, 367525) or citrate (Vacurette Tube 9 ml 9NC Coagulation  
 138 sodium citrate 3.2%; Greiner Bio-One, 455322) tubes. For collection, a single puncture of an  
 139 antecubital vein was performed for each donor using the BD Vacutainer Push Button Blood  
 140 Collection Set with pre-attached tube holder (Becton Dickinson and Company, 368657), except  
 141 for donor PNL-QJMM. For this donor, blood collection was briefly paused after filling six tubes  
 142 and continued using a second puncture in the contralateral antecubital vein (Table 2). Each  
 143 blood draw from each puncture, except the second puncture of donor PNL-QJMM, started with  
 144 collecting 2-3 ml blood in a waste tube, followed by collection of the different tube types. The  
 145 collection order of these tubes was randomized per donor. Blood tubes were filled to the  
 146 volume recommended by the manufacturer and plasma tubes were inverted 5 times to mix the  
 147 anti-coagulant with the blood. Subsequently, blood collection tubes were processed  
 148 immediately (T0), or 4 h (T04) or 16 h (T16) at room temperature after blood collection in order  
 149 to prepare plasma or serum (Table 2).

150

151 **Table 2. Overview of the blood draws for exRNAQC study phase 2.** For each sequencing workflow, the blood  
 152 draw order of the tubes per donor is given. serum: BD Vacutainer SST II Advance Tube (Becton Dickinson and  
 153 Company, 367953); EDTA: BD Vacutainer Plastic K2EDTA tube (Becton Dickinson and Company, 367525); citrate:  
 154 Vacurette Tube 9 ml 9NC Coagulation sodium citrate 3.2% (Greiner Bio-One, 455322).

| blood draw experiment   | donor    | puncture | tube order  | time to process |
|-------------------------|----------|----------|-------------|-----------------|
| mRNA capture sequencing | PNL-RM7B | 1        | (1) citrate | T16             |
|                         |          |          | (2) EDTA    | T0              |
|                         |          |          | (3) citrate | T04             |
|                         |          |          | (4) serum   | T0              |
|                         |          |          | (5) citrate | T0              |
|                         |          |          | (6) EDTA    | T16             |
|                         |          |          | (7) serum   | T04             |
|                         |          |          | (8) EDTA    | T04             |
|                         |          |          | (9) serum   | T16             |
|                         | PNL-QJMM | 1        | (1) citrate | T0              |
|                         |          |          | (2) EDTA    | T0              |
|                         |          |          | (3) serum   | T16             |
|                         |          |          | (4) EDTA    | T16             |
|                         |          |          | (4) EDTA    | T16             |

| blood draw experiment | donor    | puncture | tube order  | time to process |     |
|-----------------------|----------|----------|-------------|-----------------|-----|
|                       |          |          | (5) serum   | T0              |     |
|                       |          |          | (6) EDTA    | T04             |     |
|                       |          |          | 2           | (1) citrate     | T04 |
|                       |          |          |             | (2) citrate     | T16 |
|                       |          |          |             | (3) serum       | T04 |
|                       | PNL-2AAR | 1        | (1) citrate | T04             |     |
|                       |          |          | (2) citrate | T16             |     |
|                       |          |          | (3) EDTA    | T0              |     |
|                       |          |          | (4) serum   | T0              |     |
|                       |          |          | (5) EDTA    | T16             |     |
|                       |          |          | (6) EDTA    | T04             |     |
|                       |          |          | (7) serum   | T04             |     |
|                       |          |          | (8) serum   | T16             |     |
|                       |          |          | (9) citrate | T0              |     |
|                       | PNL-XNID | 1        | (1) serum   | T0              |     |
|                       |          |          | (2) EDTA    | T04             |     |
|                       |          |          | (3) citrate | T04             |     |
|                       |          |          | (4) EDTA    | T0              |     |
|                       |          |          | (5) citrate | T0              |     |
|                       |          |          | (6) citrate | T16             |     |
|                       |          |          | (7) EDTA    | T16             |     |
|                       |          |          | (8) serum   | T04             |     |
|                       |          |          | (9) serum   | T16             |     |
|                       | PNL-ZT37 | 1        | (1) EDTA    | T0              |     |
| (2) citrate           |          |          | T0          |                 |     |
| (3) serum             |          |          | T16         |                 |     |
| (4) serum             |          |          | T04         |                 |     |
| (5) serum             |          |          | T0          |                 |     |
| (6) EDTA              |          |          | T16         |                 |     |
| (7) EDTA              |          |          | T04         |                 |     |
| (8) citrate           |          |          | T16         |                 |     |
| (9) citrate           |          |          | T04         |                 |     |
| small RNA sequencing  | PNL-7DEN | 1        | (1) citrate | T16             |     |
|                       |          |          | (2) citrate | T04             |     |
|                       |          |          | (3) EDTA    | T04             |     |
|                       |          |          | (4) serum   | T04             |     |
|                       |          |          | (5) citrate | T0              |     |
|                       |          |          | (6) EDTA    | T16             |     |
|                       |          |          | (7) EDTA    | T0              |     |
|                       |          |          | (8) serum   | T16             |     |
|                       |          |          | (9) serum   | T0              |     |
|                       | PNL-8Z11 | 1        | (1) EDTA    | T16             |     |
|                       |          |          | (2) citrate | T16             |     |
|                       |          |          | (3) citrate | T0              |     |
|                       |          |          | (4) serum   | T04             |     |
|                       |          |          | (5) EDTA    | T0              |     |
|                       |          |          | (6) serum   | T0              |     |
|                       |          |          | (7) serum   | T16             |     |
|                       |          |          | (8) citrate | T04             |     |
|                       |          |          | (9) EDTA    | T04             |     |
|                       | PNL-NLID | 1        | (1) citrate | T16             |     |
|                       |          |          | (2) serum   | T04             |     |
|                       |          |          | (3) citrate | T04             |     |
|                       |          |          | (4) EDTA    | T04             |     |
|                       |          |          | (5) serum   | T0              |     |
|                       |          |          | (6) citrate | T0              |     |
|                       |          |          | (7) EDTA    | T16             |     |
|                       |          |          | (8) serum   | T16             |     |
|                       |          |          | (9) EDTA    | T0              |     |
|                       | PNL-UCH7 | 1        | (1) EDTA    | T0              |     |
|                       |          |          | (2) citrate | T0              |     |
|                       |          |          | (3) citrate | T16             |     |

| blood draw experiment | donor       | puncture | tube order  | time to process |           |     |
|-----------------------|-------------|----------|-------------|-----------------|-----------|-----|
|                       |             |          | (4) serum   | T04             |           |     |
|                       |             |          | (5) serum   | T16             |           |     |
|                       |             |          | (6) citrate | T04             |           |     |
|                       |             |          | (7) EDTA    | T16             |           |     |
|                       |             |          | (8) EDTA    | T04             |           |     |
|                       |             |          | (9) serum   | T0              |           |     |
|                       |             |          | PNL-XNID    | 1               | (1) EDTA  | T0  |
|                       |             |          |             |                 | (2) serum | T0  |
|                       |             |          |             |                 | (3) EDTA  | T16 |
|                       | (4) citrate | T04      |             |                 |           |     |
|                       | (5) serum   | T04      |             |                 |           |     |
|                       | (6) EDTA    | T04      |             |                 |           |     |
|                       | (7) citrate | T16      |             |                 |           |     |
|                       | (8) citrate | T0       |             |                 |           |     |
|                       | (9) serum   | T16      |             |                 |           |     |

155

156 *Serum tubes* were processed at T0 (i.e. 30 min upon blood collection to enable full blood  
157 coagulation), T04 or T16 according to the following protocol. Until processing, the tubes were  
158 stored upright at room temperature. Tubes were spun for 10 min at 1300 g at room temperature  
159 using a Centrifuge 5804 (Eppendorf, 5804000013) with Rotor A-4-44 (Eppendorf,  
160 5804709004) and appropriate adapters (Eppendorf, 5804753003) at acceleration and braking  
161 ramp 0. For each tube, the obtained serum was carefully pipetted into a 15 ml tube (Greiner  
162 Bio-One International, 188271), leaving  $\pm 0.5$  cm above the separator. Serum was then  
163 aliquoted into Safe-Lock cup DNA LoBind 2 ml PCR clean tubes (Eppendorf, 0030108078),  
164 snap frozen in liquid nitrogen and stored at -80 °C. Platelets were counted and the degree of  
165 hemolysis was determined by measuring levels of free haemoglobin by spectral analysis using  
166 a NanoDrop 1000 Spectrophotometer (Thermo Fisher Scientific).

167

168 *Plasma tubes* were processed at T0 (i.e. immediately), T04 or T16 according to the following  
169 protocol. Until processing, the tubes were stored upright at room temperature. Right before  
170 centrifugation, tubes were inverted 5 times and an aliquot to measure the number of platelets  
171 present in whole blood (using an XN-1000 Hematology Analyzer (Sysmex)) was taken. Tubes  
172 were spun on a Centrifuge 5804 (Eppendorf, 5804000013) with Rotor A-4-44 (Eppendorf,  
173 5804709004) and appropriate adapters (Eppendorf, 5804753003) at acceleration and braking  
174 ramp 0. In a first centrifugation step, blood collection tubes were spun for 20 min at 400 g at  
175 room temperature, and for each tube, the obtained plasma was carefully pipetted into a 15 ml

176 tube (Greiner Bio-One International, 188271), leaving  $\pm$  0.5 cm above the buffy coat.  
177 Subsequently, these tubes were centrifuged for 10 min at 800 g at room temperature. After  
178 this second spin, the plasma was pipetted into new 15 ml tubes, leaving  $\pm$  0.5 cm above the  
179 pellets. Finally, a third spin of 15 min at 2500 g at room temperature was applied. The plasma  
180 was again pipetted into new 15 ml tubes, leaving  $\pm$  0.5 cm above the pellets, and aliquoted  
181 into Safe-Lock cup DNA LoBind 2 ml PCR clean tubes (Eppendorf, 0030108078), snap frozen  
182 in liquid nitrogen and stored at -80 °C. Platelets were counted and the degree of hemolysis  
183 was determined by measuring levels of free haemoglobin by spectral analysis using a  
184 NanoDrop 1000 Spectrophotometer (Thermo Fisher Scientific).

185

## 186 **2. Spike-in controls**

187 Adding spike-in controls is key for exRNA profiling as the RNA sequencing input is volume-  
188 based. To correct for both RNA input (either induced by the original sample or RNA isolation  
189 efficiency) and library preparation variation, two sets of spike-ins are used. RC and/or Sequin  
190 spike-ins are added during RNA isolation (upon sample lysis), and LP and/or ERCC spike-ins  
191 are added to the RNA eluate (before gDNA removal and library preparation). Depending on  
192 the amount of platelet RNA present in plasma, different spike-in concentrations are used,  
193 aiming for  $\pm$  5% reads going to the total amount of spike-ins.

194

### 195 **2.1. *Sequin and External RNA Control Consortium (ERCC) spike-in controls for*** 196 ***mRNA capture sequencing***

197 For profiling using the TruSeq RNA Exome Library Prep kit, Sequin spike-in controls (Garvan  
198 Institute of Medical Research, <https://www.sequinstandards.com>) are added to the lysate  
199 during RNA isolation. Aiming to obtain 2.5% sequencing reads aligning to the spike-in controls,  
200 a 1/1,000,000 Sequin spike-in dilution in RNase-free water was used. Per 100  $\mu$ l liquid biopsy  
201 input volume, 1  $\mu$ l Sequin spike-in controls (Garvan Institute of Medical Research<sup>27</sup>) was  
202 added to the lysate (see main manuscript).

203

204 The second spike-in set for profiling using the TruSeq RNA Exome Library Prep kit that we  
205 add after RNA isolation are ERCC spikes (ThermoFisher Scientific, 4456740). As for the  
206 Sequin spike-ins, we aimed to have 2.5% of the reads going to these RNA molecules. Here, a  
207 1/500,000 dilution in RNase-free water was used. ERCC spikes were added before gDNA  
208 removal (see main manuscript for volumes).

209

## 210 **2.2. Capture probes for Sequin and ERCC spike-in controls**

211 To detect the spike-in controls, the capture probes of the TruSeq RNA Exome kit are  
212 complemented with capture probes for both the Sequin and ERCC spike-in sets in the first and  
213 second hybridization step of the library preparation protocol. These probes are 80-mers  
214 designed by tiling the spike-in sequences and do not map to the human genome. To this  
215 purpose, only 80-mers with a GC content between 25-70%, a GC-based  $T_m$  between 60-80  
216 °C and a  $\Delta G$  larger than -7 (calculated by UNAFold (version 3.8) settings: hybrid-ss-min -E -n  
217 DNA -t 54 -T 54) were retained, and further filtered to end up with 3560 probes, i.e. the minimal  
218 number of probes needed to obtain optimal spike-in coverage. The sequences of these oligos  
219 are provided in Supplemental table 11. Here, a 70.4 ng/ $\mu$ l stock concentration of biotinylated  
220 80-mer capture probes (Twist Biosciences) was used, resulting in a concentration of 4 nM per  
221 probe.

222

## 223 **2.3. RNA extraction Control (RC) and Library Prep Control (LP) spike-ins for small** 224 **RNA sequencing**

225 For profiling using the TruSeq Small RNA Library Prep Kit, RNA extraction Control (RC) spike-  
226 ins (custom order at IDT) are added to the lysate during RNA isolation, and Library Prep  
227 Control (LP) spike-ins to the RNA eluate.

228 RC spike-ins are a pool of RNA extraction dynamic range controls (25-mer  
229 oligoribonucleotides; RC1-01 - RC1-12) and RNA extraction size controls (25-, 28- or 34-mer  
230 oligoribonucleotide; RC2-25 - RC2-34) selected from literature (Locati et al., Nucleic Acids  
231 Res., 2015). RC spike-in IDs and sequences are listed in Table 3.

232

233 **Table 3. Different RNA extraction Control (RC) spike-ins are used.** For each RC spike-in, the ID, sequence and  
 234 relative concentration in the 10 pM RC spike-in pool are shown.

| RC spike-in IDs | sequence                           | relative concentration |
|-----------------|------------------------------------|------------------------|
| RC1-01          | ACUCAUCUACGUACGCAUCUAGUCU          | 0.01 x                 |
| RC1-03          | UGCUAUCAUAUCACAGUACGCGAGC          | 0.01 x                 |
| RC1-04          | UAGAUGAGAUACUGAUAGCGACGUA          | 0.01 x                 |
| RC1-06          | AUCGUCUCGUCAUCUCAUAUCUACA          | 0.1 x                  |
| RC1-07          | UAUGCAUAUGAUCACGAGACUCAGU          | 1 x                    |
| RC1-09          | GCUCUACACUCUACUCGUCAGCUGU          | 1 x                    |
| RC1-10          | CGAUGCUAUAGACUCUCACGUGAUG          | 1 x                    |
| RC1-11          | CGCAUCAGUCGUCAUCUAGAUACAG          | 0.1 x                  |
| RC1-12          | CUGAUGAUAGAUACGCGCACACAGU          | 0.1 x                  |
| RC2-25          | AUGCUGAUGAUAGACGCUACUGACU          | 0.1 x                  |
| RC2-28          | CGUAUCGCGUCUCUGAGUCACUAUCUAC       | 0.1 x                  |
| RC2-34          | AGAUAGUACUGAUCUGCUGCGACGAGUGACUGUC | 0.1 x                  |

235

236 LP spike-ins are a pool of small RNA sequencing library prep controls (22-mer  
 237 oligoribonucleotides; LP1-01 - LP1-12) selected from literature (Hafner et al., RNA, 2011). LP  
 238 spike-in IDs and sequences are listed in Table 4.

239

240 **Table 4. Different Library Prep Control (LP) spike-ins are used.** For each LP spike in, the ID, sequence and  
 241 relative concentration in the 10 pM LP spike-in pool are shown.

| LP spike-in IDs | sequence                | relative concentration |
|-----------------|-------------------------|------------------------|
| LP1-01          | GUCCCACUCCGUAGAUUCUGUUC | 1 x                    |
| LP1-02          | GAUGUAACGAGUUGGAAUGCAA  | 0.01 x                 |
| LP1-03          | UAGCAUAUCGAGCCUGAGAACA  | 0.1 x                  |
| LP1-04          | CAUCGGUCGAACUUAUGUGAAA  | 0.01 x                 |
| LP1-06          | UCUUAACCCGGACCAGAAACUA  | 1 x                    |
| LP1-07          | AGGUUCCGGAUAAGUAAGAGCC  | 1 x                    |
| LP1-10          | UGAUACGGAUGUUUAUCGCAGC  | 0.1 x                  |
| LP1-11          | CCUGGAACUUAGGACGUGAAUC  | 0.1 x                  |
| LP1-12          | UCAUGAGUCCGUACCUUGAUUG  | 0.01 x                 |

242

243 RC and LP spike-ins concentrations were optimized, aiming to obtain 2.5% sequencing reads  
 244 aligning to the spike-in controls. To this purpose, RC and LP spike-ins were dissolved to 200  
 245  $\mu$ M stock solutions using nuclease-free water (Sigma-Aldrich, W4502), and equimolarly pooled  
 246 to 333 nM. Subsequently, 6.25 pM, 625 fM and 62.5 fM pools were created using a 500 nM  
 247 carrier oligo (TCGAAGTATTC; diluted in nuclease-free water) to dilute the initial 333 nM pool.  
 248 These three pools were spiked into plasma during RNA isolation, by adding 2  $\mu$ l to the lysate,  
 249 followed by TruSeq Small RNA Library Prep sequencing. Based on these sequencing data, a

250 separate RC spike-in and LP spike-in pool was created, in which each RNA control is diluted  
251 at a different concentration, in order to correct for adaptor ligation bias during library  
252 preparation. To this purpose, the RC and LP spike-in stock solutions were diluted to 5  $\mu$ M using  
253 nuclease-free water, and pooled into a ligation bias-corrected 10 pM RC spike-in pool and 10  
254 pM LP spike-in pool, respectively, using 500 nM carrier oligo. The indicated 10 pM  
255 concentration of these pools corresponds to the concentration of RC2-34, which has the  
256 highest ligation efficiency. Concentrations of the remaining spikes are relative to the RC2-34  
257 concentration (Table 3). Finally, using these ligation-bias corrected 10 pM pools and 500 nM  
258 carrier oligo, RC and LP spike-in pools were made. The final ligation bias-corrected  
259 concentration of RC spike-in pool was 1259 fM for the kit comparison study (exRNAQC011),  
260 and 191 fM for the tube comparison study (exRNAQC013) and phase 2 (exRNAQC017 small  
261 RNA sequencing). The final ligation bias-corrected concentration of LP spike-in pool was 486  
262 fM for the kit comparison study (exRNAQC011), and 34 fM for the tube comparison study  
263 (exRNAQC013) and phase 2 (exRNAQC017 small RNA sequencing). Per 100  $\mu$ l liquid biopsy  
264 input volume, 1  $\mu$ l RNA extraction Control (RC) spike-ins was added to the lysate during RNA  
265 purification. LP spikes were added before gDNA removal (see main manuscript for volumes).

266

### 267 **3. RNA purification methods**

268

#### 269 **3.1. *The miRNeasy Serum/Plasma Kit (abbreviated to MIR; Qiagen, 217184)***

270 All RNA purifications throughout the study are performed using the miRNeasy Serum/Plasma  
271 Kit, unless specified otherwise. For evaluation of the different exRNA purification methods,  
272 RNA purifications were performed in triplicate and 200  $\mu$ l plasma was used per RNA  
273 purification, as the manufacturer's manual indicates a maximum recommended biofluid input  
274 volume of 200  $\mu$ l; required minimum volumes are not mentioned.

275 Plasma is thawed on ice and 1000  $\mu$ l QIAzol Lysis Reagent is added to each sample. Samples  
276 are vortexed and incubated for 5 min at room temperature, followed by the addition of Sequin  
277 control spike-ins and/or RC RNA extraction Control (RC) spike-ins. Subsequently, samples are

278 vortexed and 200 µl chloroform is added, followed by vortexing of the lysates for 15 s. After a  
279 2 min incubation at room temperature, samples are centrifuged for 15 min at 12000 g at 4 °C.  
280 Next, 600 µl of the upper aqueous phase is transferred to a new collection tube on ice, to which  
281 900 µl ethanol is pipetted. Samples are mixed by pipetting up and down, loaded (up to 700 µl)  
282 on an RNeasy MinElute spin column and centrifuged for 15 s at 10000 g at room temperature.  
283 The flowthrough is discarded, and loading and centrifugation repeated using the remainder of  
284 the samples. Afterwards, 700 µl RWT buffer is added to the column and samples are  
285 centrifuged for 15 s at 10000 g. Flowthroughs are discarded and 500 µl RPE buffer is pipetted  
286 onto the columns, followed by centrifugation for 15 s at 10000 g. Again, flowthroughs are  
287 discarded, and 500 µl 80 % ethanol is loaded onto the columns. Samples are centrifuged for  
288 2 min at 10000 g, and afterwards, the columns are placed into a new collection tube (with open  
289 lid) and dried for 5 min at full speed (16900 g). Finally, the columns are placed in a new  
290 collection tube, 14 µl RNase-free water (Sigma, W4502) is added to the center of the column  
291 membrane, and RNA is eluted by centrifugation for 1 min at full speed.

292

293 **3.2. The miRNeasy Serum/Plasma Advanced Kit (abbreviated to MIRA; Qiagen,**  
294 **217204)**

295 For evaluation of the different exRNA purification methods, RNA purifications were performed  
296 in triplicate, and a minimum and maximum input volume of 200 µl and 600 µl plasma was used,  
297 respectively. In phase 2, 600 µl plasma input volume was used.

298 Plasma is thawed on ice and 60 µl Buffer RPL is added per 200 µl of plasma input volume.  
299 Samples are vortexed for 5 s and left at room temperature for 3 min, followed by the addition  
300 of Sequin control spike-ins and/or RC RNA extraction Control (RC) spike-ins. Per 200 µl  
301 plasma input volume, 20 µl RPP Buffer is added. Samples are vortexed for >20 s, incubated  
302 at room temperature for 3 min, and centrifuged at 12000 g for 3 min. Per 200 µl plasma input  
303 volume, 220 µl of the clear and colourless supernatant is transferred to a new tube and 1  
304 volume of isopropanol is added, and tubes are vortexed. The entire sample (up to 700 µl) is  
305 transferred to a RNeasy UCP MinElute column and centrifuged for 15 s at 10000 g, and loading

306 and centrifugation repeated with the remainder of the samples (only for the maximum plasma  
307 input volume). Flowthroughs are discarded and 700 µl Buffer RWT is added onto the column.  
308 Columns are again centrifuged for 15 s at 10000 g and flowthroughs discarded. Next, 500 µl  
309 buffer RPE is added onto the column and samples are centrifuged for 15 s at 10000 g.  
310 Flowthroughs are discarded and 500 µl 80 % ethanol is added to the column. Columns are  
311 centrifuged for 2 min at 10000 g and placed in a new collection tube. Columns are centrifuged  
312 at full speed (16900 g) for 5 min, with open lid to dry the membrane. Dry columns are placed  
313 in a new 1.5 ml collection tube and 20 µl RNase-free water (Sigma, W4502) is added directly  
314 to the center of the spin column membrane and incubated for 1 min. Next, columns are  
315 centrifuged for 1 min at full speed (16900 g) to elute the RNA.

316

317 **3.3. The mirVana PARIS Kit (abbreviated to MIRV (and MIRVE); Life Technologies,**  
318 **AM1556)**

319 For evaluation of the different exRNA purification methods, RNA purifications were performed  
320 in triplicate, and a minimum and maximum biofluid input volume of 100 µl and 625 µl was used,  
321 respectively. Although not explicitly stated by the manufacturer, the minimum input volume  
322 was set on 100 µl based on the manufacturer's indication that smaller sample volumes need  
323 to be diluted to 100 µl with Cell Disruption Buffer.

324 Plasma is thawed on ice and added to an equal volume of 2x Denaturing Solution at room  
325 temperature. This mixture is incubated for 5 min on ice and Sequin control spike-ins and/or RC  
326 RNA extraction Control (RC) spike-ins are added, followed by adding a volume of Acid-  
327 Phenol:Chloroform equal to the total lysate volume. Samples are mixed by vortexing for 60 s  
328 and centrifuged for 5 min at 10000 g at room temperature to separate the mixture into aqueous  
329 and organic phases. The aqueous phase (i.e. 140 µl and 650 µl for the minimum and plasma  
330 input volume, respectively) is recovered and transferred to a fresh tube. Subsequently, 1.25  
331 volumes of 100 % ethanol are added to the aqueous phase, and the mixed sample (up to 700  
332 µl) is pipetted onto a Filter Cartridge and centrifuged for 30 s (all centrifugation steps are at  
333 10000 g). Flowthroughs are discarded, and loading on the Filter Cartridge and centrifugation

334 repeated using the remainder of the samples. Filter Cartridges are washed by applying 700  $\mu$ l  
335 miRNA Wash Solution 1 and centrifuging for 15 s. The flowthrough is discarded. Next, samples  
336 are washed twice by applying 500  $\mu$ l Wash Solution 2/3 and centrifuging for 15 s. After  
337 discarding the flowthrough from the last wash, the Filter Cartridge is replaced in the Collection  
338 Tube and spun for 1 min to remove residual fluid from the filter. To elute the RNA, 100  $\mu$ l of  
339 preheated Elution Solution is pipetted to the center of the filter, placed in a new Collection  
340 Tube, and samples are centrifuged for 30 s.

341 For evaluation of the different exRNA purification methods for small RNA sequencing, also an  
342 alternative protocol claiming to enrich for small RNAs (abbreviated to MIRVE) was tested. The  
343 first steps are identical to the purification protocol described above. After recovering the  
344 aqueous phase, 1/3 volume of 100 % ethanol is added and mixed with the lysate. Then, the  
345 mixture (up to 700  $\mu$ l) is pipetted onto a Filter Cartridge and centrifuged for 30 s. The filtrate is  
346 transferred to a fresh tube. These steps are repeated with the remainder of the sample.  
347 Filtrates are pooled and the total volume of filtrate is determined. Next, 2/3 volume of room  
348 temperature 100 % ethanol is added to the filtrate, and the sample is mixed thoroughly. This  
349 mixture is passed through a second Filter Cartridge. This time, the flowthrough is discarded,  
350 and the Filter Cartridge is washed and RNA eluted as described for the purification protocol  
351 above (i.e. MIRV).

352

353 **3.4. The NucleoSpin miRNA Plasma Kit (abbreviated to NUC; Macherey-Nagel,**  
354 **740981.50)**

355 For evaluation of the different exRNA purification methods, RNA purifications were performed  
356 in triplicate, and a minimum and maximum biofluid input volume of 300  $\mu$ l and 900  $\mu$ l was used,  
357 respectively.

358 Plasma is thawed on ice and 90  $\mu$ l MLP Buffer per 300  $\mu$ l input volume is added. Samples are  
359 vortexed for 5 s and incubated for 3 min at room temperature. Sequin control spike-ins and/or  
360 RC RNA extraction Control (RC) spike-ins are added to the lysate. Next, 30  $\mu$ l MPP Buffer per  
361 300  $\mu$ l plasma input volume is added. Samples are vortexed for 5 s, incubated for 1 min at

362 room temperature and centrifuged for 3 min (all centrifugation steps are at 11000 g). The clear  
363 supernatant (i.e. 250 µl and 1100 µl for the minimum and maximum input volume, respectively)  
364 is transferred into a new Collection Tube and per 300 µl plasma input volume 400 µl  
365 isopropanol is added. Samples are vortexed for 5 s, loaded onto a NucleoSpin miRNA Column,  
366 incubated for 2 min at room temperature and centrifuged for 30 s. Flowthroughs are discarded  
367 and loading repeated with the remainder of the samples. Next, the columns are washed by  
368 adding 100 µl Buffer MW1 and centrifuging for 30 s. Flowthroughs are discarded and columns  
369 washed a second and third time by adding 700 µl Buffer MW2 and centrifuging for 30 s, and  
370 adding 250 µl Buffer MW2 and centrifuging for 2 min, respectively. Subsequently, the column  
371 is placed into a new Collection Tube, and 30 µl RNase-free water (Sigma, W4502) pipetted  
372 onto the silica membrane. Samples are incubated for 1 min at room temperature and  
373 centrifuged for 1 min to elute the RNA.

374

### 375 **3.5. The QIAamp ccfDNA/RNA Kit (abbreviated to CCF; Qiagen, 55184)**

376 For evaluation of the different exRNA purification methods, RNA purifications were performed  
377 in triplicate, and a minimum and maximum input volume of 1000 µl and 4000 µl plasma was  
378 used, respectively. In phase 2, 2000 µl plasma input volume was used.

379 Plasma is thawed on ice, transferred to a 15 ml collection tube and 300 µl Buffer RPL is added  
380 for each 1000 µl of plasma. Samples are vortexed for 5 s and left at room temperature for 3  
381 min, followed by the addition of Sequin control spike-ins and/or RC RNA extraction Control  
382 (RC) spike-ins. Per 1000 µl plasma input volume, 100 µl Buffer RPP is added. Samples are  
383 vortexed for >20 s and incubated on ice for 3 min. Proteins are precipitated by centrifuging the  
384 samples at 3000 g for 10 min. The clear and colourless supernatant (i.e. 1100 µl and 4400 µl  
385 for the minimum and maximum plasma input volume, respectively) is transferred to a new tube  
386 (on ice), 1 volume of ice-cold isopropanol is added and the tubes are vortexed. Up to 4000 µl  
387 sample is transferred to an RNeasy Midi spin column and the column is centrifuged at room  
388 temperature for 1 min at 3000 g. Flowthroughs are discarded, and loading repeated with the  
389 remainder of the samples. Next, 4000 µl Buffer RWT is added to the column. Columns are

390 centrifuged for 1 min at 3000 g and flowthroughs are discarded, followed by the addition of  
391 2500 µl Buffer RPE and centrifugation for 5 min at 3000 g. After placing the columns into a  
392 new 15 ml collection tube, 200 µl RNase-free water (Sigma, W4502) is added directly to the  
393 center of the membrane and columns are incubated for 1 min. Next, columns are centrifuged  
394 for 1 min at full speed (4500 g) to elute the RNA. Subsequently, 200 µl Buffer RPL and 800 µl  
395 100 % ethanol are added to the eluate and samples are mixed by pipetting up and down. Up  
396 to 700 µl sample is pipetted onto an RNeasy MinElute spin column. Columns are centrifuged  
397 at 10000 g for 15 s at room temperature, flowthroughs discarded and loading repeated with  
398 the remainder of the samples. Subsequently, 500 µl Buffer RPE is pipetted onto the column,  
399 followed by centrifuging the columns for 15 sec at 10000g. Flowthroughs are discarded and  
400 500 µl 80 % ethanol is added to the columns. The columns are again centrifuged for 15 s at  
401 10 000 g and placed in a fresh collection tube, followed by centrifugation for 5 min at full speed  
402 (16900 g), with open lid to dry the membrane. Then, the columns are placed in a new 1.5 ml  
403 collection tube and 14 µl RNase free water (Sigma, W4502) is added directly to the center of  
404 the spin column membrane. Finally, columns are centrifuged for 1 min at full speed (16900 g)  
405 to elute the RNA.

406

407 **3.6. The Plasma/Serum Circulating and Exosomal RNA Purification Kit/Slurry Format**  
408 **(abbreviated to CIRC; Norgen Biotek Corp., 42800)**

409 For evaluation of the different exRNA purification methods, RNA purifications were performed  
410 in triplicate, and a minimum and maximum biofluid input volume of 250 µl and 5000 µl was  
411 used, respectively. Note that depending on the plasma input volume that is used, the  
412 manufacturer's manual instructs to use different volumes of Lysis Buffer A and 100 % ethanol.  
413 Here, we provide the protocol to specifically process 250 µl plasma. Adjusted volumes to  
414 process 5000 µl plasma are indicated between brackets. In addition, note that in the  
415 manufacturer's manual centrifugation speeds are quoted in rpm. The indicated speeds thus  
416 depend on the radius of the centrifuge rotor. Here, a Centrifuge 5804 (Eppendorf, 5804000013)  
417 with Rotor A-4-44 (Eppendorf, 5804709004) was used at the start of the protocol. As soon as

418 samples were loaded onto spin columns (see protocol below), centrifugation steps were  
419 performed using a Centrifuge 5424R (Eppendorf, 5404000618) with Rotor FA-45-24-11  
420 (Eppendorf, 5424700004).

421  
422 Plasma is thawed on ice and 200 µl Slurry C2 and 300 µl (9800 µl) Lysis Buffer A is added.  
423 Samples are mixed by vortexing for 15 s. After incubation for 10 min at 60 °C, Sequin control  
424 spike-ins and/or RC RNA extraction Control (RC) spike-ins are added, as well as 750 µl (15000  
425 µl) 100 % ethanol, and samples are vortexed for 15 s, followed by centrifugation for 30 s at  
426 1000 RPM (all centrifugation steps are at room temperature). The supernatant is carefully  
427 decanted and 300 µl Lysis Buffer A is added to the pellet. Samples are mixed well by vortexing  
428 for 15 s and incubated for 10 min at 60 °C. Then, 300 µl 100 % ethanol is added and the  
429 mixture is vortexed for 15 s. Next, the samples (up to 650 µl) are loaded onto a Mini Filter Spin  
430 column and centrifuged for 1 min at 14000 RPM. Flowthroughs are discarded. This loading  
431 and centrifugation step is repeated with the remainder of the samples. Subsequently, 400 µl  
432 Wash Solution A is applied to the column, followed by centrifugation for 1 minute at 14000  
433 RPM and discarding the flowthrough. This wash step is repeated two more times, for a total of  
434 three washes. Columns are spun empty, for 3 min at 14000 RPM and transferred to a fresh  
435 Elution tube. To elute the RNA, 100 µl Elution Solution A is applied to the column and samples  
436 are centrifuged for 2 min at 2000 RPM, followed by 3 min at 14000 RPM.

437  
438 **3.7. The Maxwell RSC miRNA Plasma and Serum Kit (Promega, custom catalog**  
439 **AX5740, AS1680) in combination with the Maxwell RSC Instrument (abbreviated to MAX;**  
440 **Promega, AS4500)**

441 For evaluation of the different exRNA purification methods, RNA purifications were performed  
442 in triplicate, and a minimum and maximum biofluid input volume of 100 µl and 500 µl was used,  
443 respectively. At the time the exRNAQC study was set up, the Maxwell RSC miRNA Plasma  
444 and Serum Kit was not yet commercially available, and purifications were performed using  
445 custom catalog number AX5740, received from the company. To test the interactions between

446 pre-analytics, the commercially available kit (AS1680) was used. Note that these two versions  
447 of the kit have similar components, except for the Maxwell RSC cartridges. The difference  
448 between cartridges is that the commercially available cartridge (AS1680) uses a newer  
449 magnetic purification cellulose resin and seal stock material (e-mail communication Promega).

450

#### 451 *3.7.1. Protocol AX5740*

452 Plasma is thawed on ice and 80 µl Proteinase K and 230 µl Binding Buffer is added. Samples  
453 are vortexed for 10 s and incubated for 15 min at 37 °C. During this incubation step, the RSC  
454 Cartridges are prepared as follows. The cartridges are placed in the RSC deck trays with well  
455 #1 facing away from the Elution Tubes, and snapped into position by pressing down on the  
456 cartridges. Seals are removed and a RSC Plunger is placed into well #8 of each cartridge.  
457 Sequin control spike-ins and/or RC RNA extraction Control (RC) spike-ins are added to well  
458 #1 and 50 µl Nuclease-Free Water to each Elution Tube. After the incubation step, the lysate  
459 is added to well #1. Subsequently samples are loaded onto the instrument and the automated  
460 purification run is started according to the Maxwell RSC miRNA method.

461

#### 462 *3.7.2. Protocol AS1680*

463 Plasma is thawed on ice and 80 µl Proteinase K and 230 µl Lysis Buffer C is added. Samples  
464 are vortexed for 5 s and incubated for 15 min at 37 °C. During this incubation step, the RSC  
465 Cartridges are prepared as follows. The cartridges are placed in the RSC deck trays with well  
466 #1 facing away from the Elution Tubes, and snapped into position by pressing down on the  
467 cartridges. Seals are removed and a RSC Plunger is placed into well #8 of each cartridge.  
468 Sequin control spike-ins and/or RC RNA extraction Control (RC) spike-ins are added to well  
469 #1 and 50 µl Nuclease-Free Water to each Elution Tube. After the incubation step, the lysate  
470 is added to well #1. Subsequently samples are loaded onto the instrument and the automated  
471 purification run is started according to the miRNA Plasma and Serum method.

472

#### 473 **3.8. *The MagNA Pure 24 Total NA Isolation Kit (Roche, 07658036001) in combination***

474 ***with the MagNA Pure 24 instrument (abbreviated to MAP; Roche, 07290519001)***

475 For evaluation of the different exRNA purification methods, a minimum and maximum biofluid  
476 input volume of 2000 µl and 4000 µl was used, respectively. As recommended by the  
477 manufacturer, we made use of the cfNA ss 2000 protocol for 2000 µl samples and the cfNA ss  
478 4000 protocol for 4000 µl samples.

479 Plasma is thawed on ice and aliquoted in volumes of 1050 µl into 1.5 ml microcentrifuge tubes.  
480 To each tube, 105 µl proteinase K is added and samples are incubated for 20 min at 37 °C.  
481 After incubation, 1000 µl of each microcentrifuge tube is pooled into a Falcon round bottomed  
482 test tube (VWR, 734-0446) to obtain 2000 µl and 4000 µl input volumes. Next, cfNA buffer mix  
483 is prepared in bulk by mixing 1750 µl Cell-Free Nucleic Acid Enhancement Buffer (CELB) with  
484 300 µl Isopropanol (IPA) per 2000 µl sample. Of this cfNA buffer mix, 2000 µl and 4000 µl is  
485 added to the 2000 µl and 4000 µl input samples, respectively, followed by the addition of  
486 Sequin control spike-ins and/or RC RNA extraction Control (RC) spike-ins. Samples are  
487 thoroughly mixed by dispensing and aspirating the liquid 8 times to produce a homogeneous  
488 mixture, and centrifuged at 1400 g for 1 minute. Remaining bubbles were removed with the  
489 back of a tip. The MagNA Pure 24 instrument was loaded as described in the manufacturer's  
490 manual and samples were eluted in 50 µl.

491

#### 492 **4. RNA concentration measurements**

493 Eluate RNA concentrations are measured using the Femto Pulse system (Agilent  
494 Technologies, M5330AA) with the Ultra Sensitivity RNA Kit (Agilent Technologies, FP-1201-  
495 0275) according to the manufacturer's instructions.

496

#### 497 **5. References**

498 Hafner M, Renwick N, Brown M, Mihailović A, Holoch D, Lin C, Pena JTG, Nusbaum JD,  
499 Morozov P, Ludwig J, Ojo T, Luo S, Schroth G, Tuschl T. RNA-ligase-dependent biases in  
500 miRNA representation in deep-sequenced small RNA cDNA libraries. RNA. 2011; 17(9):1697-  
501 712.

502

503 Locati MD, Terpstra I, de Leeuw WC, Kuzak M, Rauwerda H, Ensink WA, van Leeuwen S,  
504 Nehrdich U, Spaik HP, Jonker MJ, Breit TM, Dekker RJ. Improving small RNA-seq by using  
505 a synthetic spike-in set for size-range quality control together with a set for data normalization.  
506 Nucleic Acids Res. 2015; 43(14):e89.
