# Supplementary material for: Dramatic impact of blood collection tube and RNA purification method on extracellular RNA transcriptomes
Source: Research Square preprint supplement (doi:10.21203/rs.3.rs-2409038/v1), 2024-07-15
Supplement: Supplementary file [file af78b02a6bd382d83d202154.pdf]

# Supplementary Fig. 15.

- miRNeasy Serum/Plasma Advanced Kit (MIRA)
- Plasma/Serum Circulating and Exosomal RNA Purification Kit/Slurry Format (CIRC)
- mirVana PARIS Kit with purification protocol for RNA enriched for small RNAs (MIRVE)
- Maxwell RSC miRNA Plasma and Serum Kit in combination with the Maxwell RSC Instrument (MAX)
- NucleoSpin miRNA Plasma Kit (NUC)
- miRNeasy Serum/Plasma Kit (MIR)
- QIAamp ccfDNA/RNA Kit (CCF)
- mirVana PARIS Kit (MIRV)

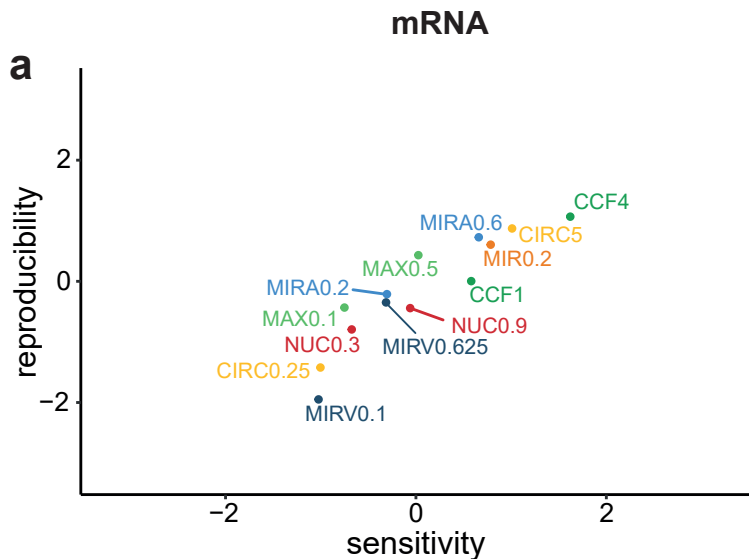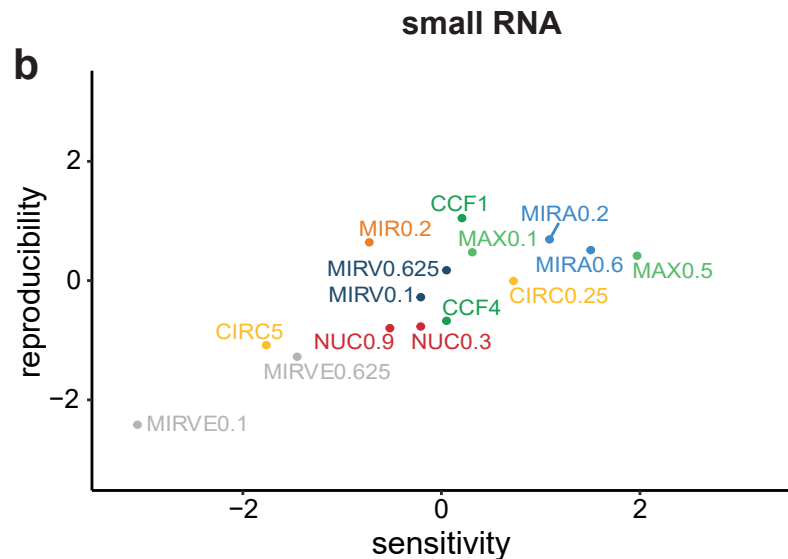

**Supplementary Fig. 15: Kit selection for exRNAQC phase 2 for mRNA capture (a) and small RNA (b) sequencing.** Median robust z-score (see Methods) per kit-input volume combination (13 in a, 15 in b) shown for sensitivity and reproducibility metrics; Number that follows the abbreviation of the purification kit is the plasma input volume (in ml).
