# Supplementary material for: Dramatic impact of blood collection tube and RNA purification method on extracellular RNA transcriptomes
Source: Research Square preprint supplement (doi:10.21203/rs.3.rs-2409038/v1), 2024-07-15
Supplement: Supplementary file [file c17db5778be9def13377052c.pdf]

Supplementary Fig. 16.

**Adjustable settings**

Analysis type:  ▼

Gene / Reporter:

Track:  ▼ ⓘ

Values:  ▼

Transformation:  ▼ ⓘ

**Sample Filter**

Subset track:  ▼ ⚙️ ⓘ

Selected sample subset: None

**Graphics**

Graph type:  ▼ ⓘ

Extra Graph Option:  ▼ ⓘ

Samples to mark:

Color mode:  ▼

**Track Display Selection**

**More Settings** +

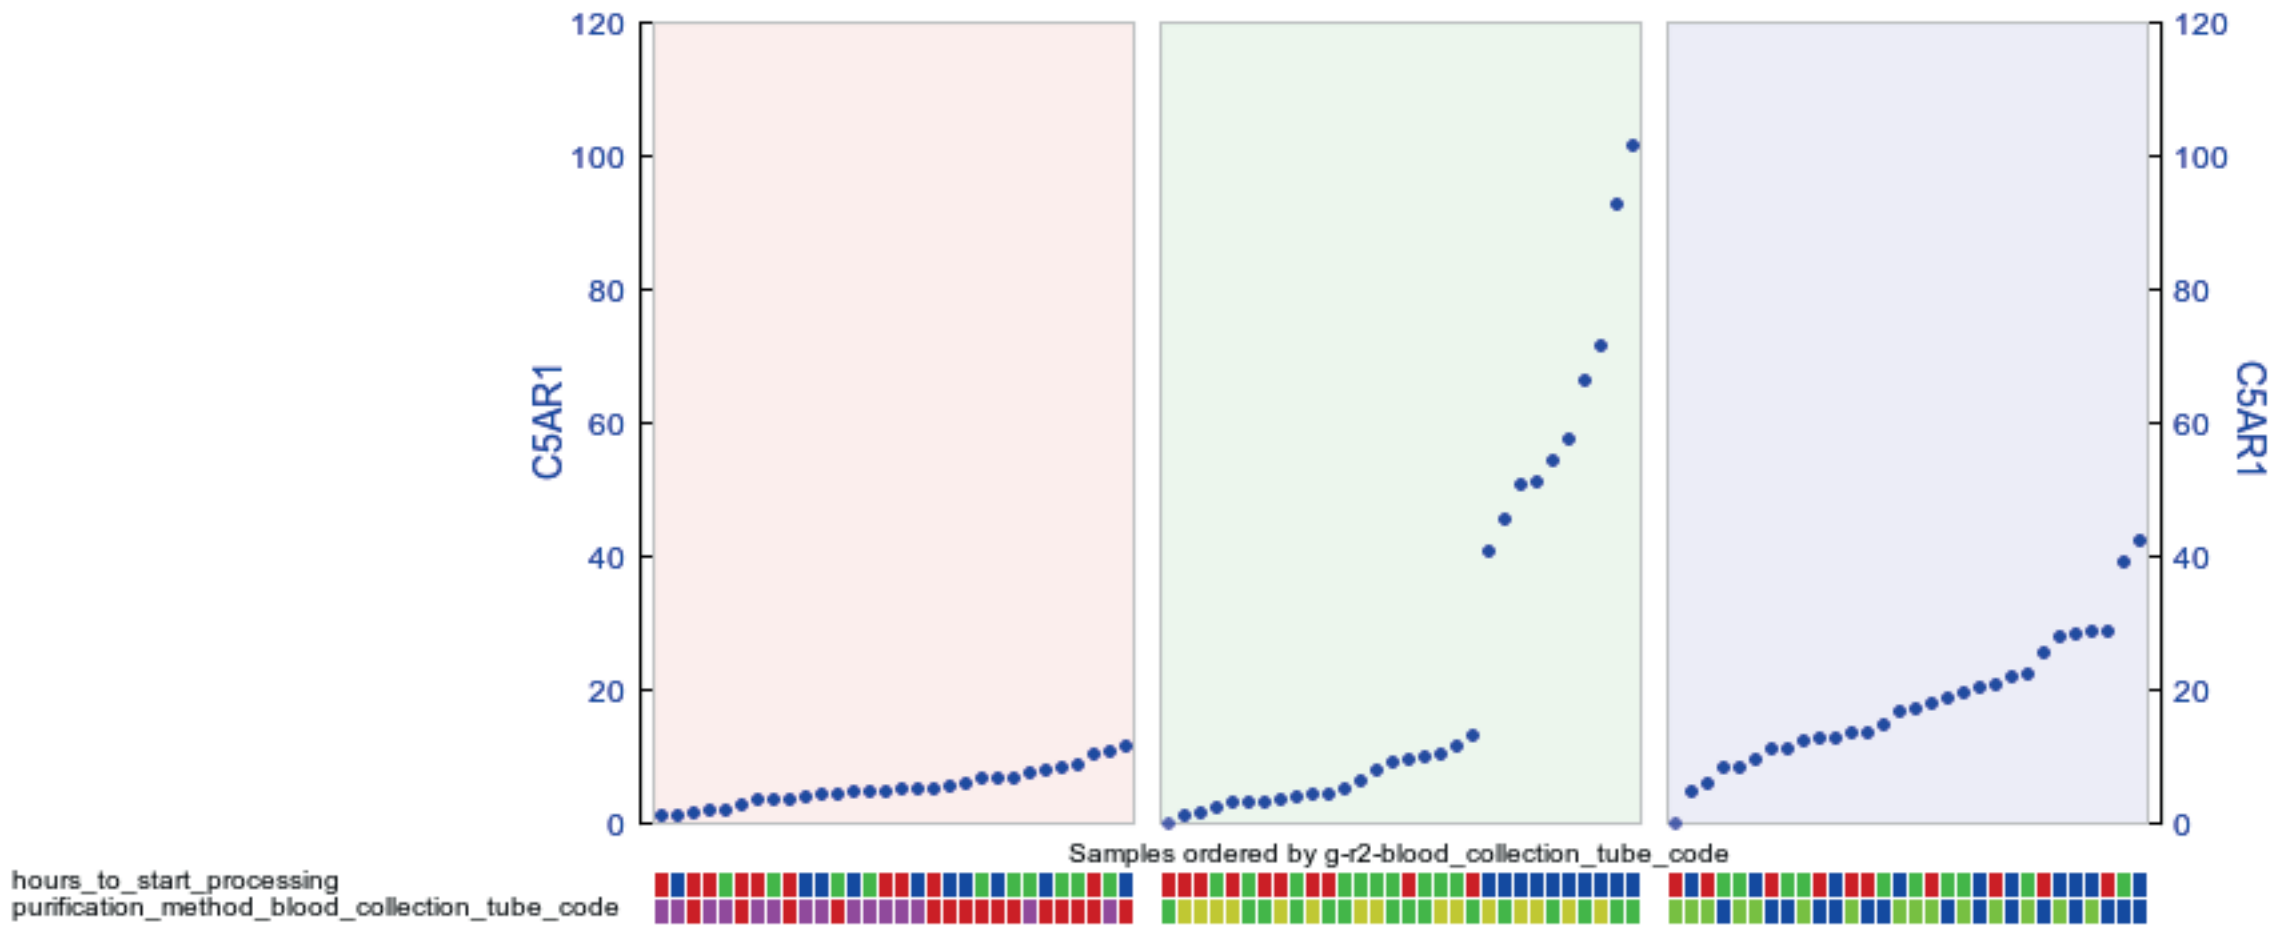

**Supplementary Fig. 16: Data access through the R2 Genomics Analysis and Visualization Platform enables browsable result access for any researcher to mine and analyze the exRNAQC data.** Shown are abundance levels of a gene (C5AR1), identified by the gene set enrichment analyses on the data of exRNAQC phase 2 as differentially abundant between time interval T0 and T16 in EDTA. Following the settings in the upper panel to 'View a gene in groups', this can be nicely visualized in R2 (lower panel). Red panel is Citrate, green is EDTA, purple is Serum. In the annotation track 'hours\_to\_start\_processing', red represents T0, green T04, and blue T16. Mouse hover actions enable to visualize these annotations on the online platform.
